# Supplementary material for: NOS2 and S-nitrosothiol signaling induces DNA hypomethylation and LINE-1 retrotransposon expression
Source: PubMed Central journal article supplement — Proc Natl Acad Sci U S A. 2022 May 18;119(21):e2200022119. doi: 10.1073/pnas.2200022119 (PMC9173756; doi:10.1073/pnas.2200022119), 2022-05-18
Supplement: pnas.2200022119.sapp.pdf [file pnas.2200022119.sapp.pdf]

## **Supplementary Information for** **NOS2 and S-nitrosothiol signaling induces DNA hypomethylation and** **LINE-1 retrotransposon expression.**

Christopher H. Switzer<sup>1\*</sup>, Hyun-Ju Cho<sup>1</sup>, Thomas R. Eykyn<sup>2</sup>, Paul Lavender<sup>3</sup> and Philip Eaton<sup>1\*</sup>

<sup>1</sup>William Harvey Research Institute, Barts & The London School of Medicine and Dentistry, Queen Mary University of London, London, United Kingdom. <sup>2</sup>School of Biomedical Engineering & Imaging Sciences, King's College London, St. Thomas' Hospital, London, UK. <sup>3</sup>AsthmaUK Centre in Allergic Mechanisms of Asthma, School of Immunology and Microbial Science, King's College London, Guy's Hospital, London, United Kingdom

\* Christopher H. Switzer or Philip Eaton

**Email:** [c.switzer@qmul.ac.uk](mailto:c.switzer@qmul.ac.uk) or [p.eaton@qmul.ac.uk](mailto:p.eaton@qmul.ac.uk)

### **This PDF file includes:**

Figures S1 to S7  
Tables S1 to S6  
Legends for Datasets S1  
SI References

### **Other supplementary materials for this manuscript include the following:**

Datasets S1

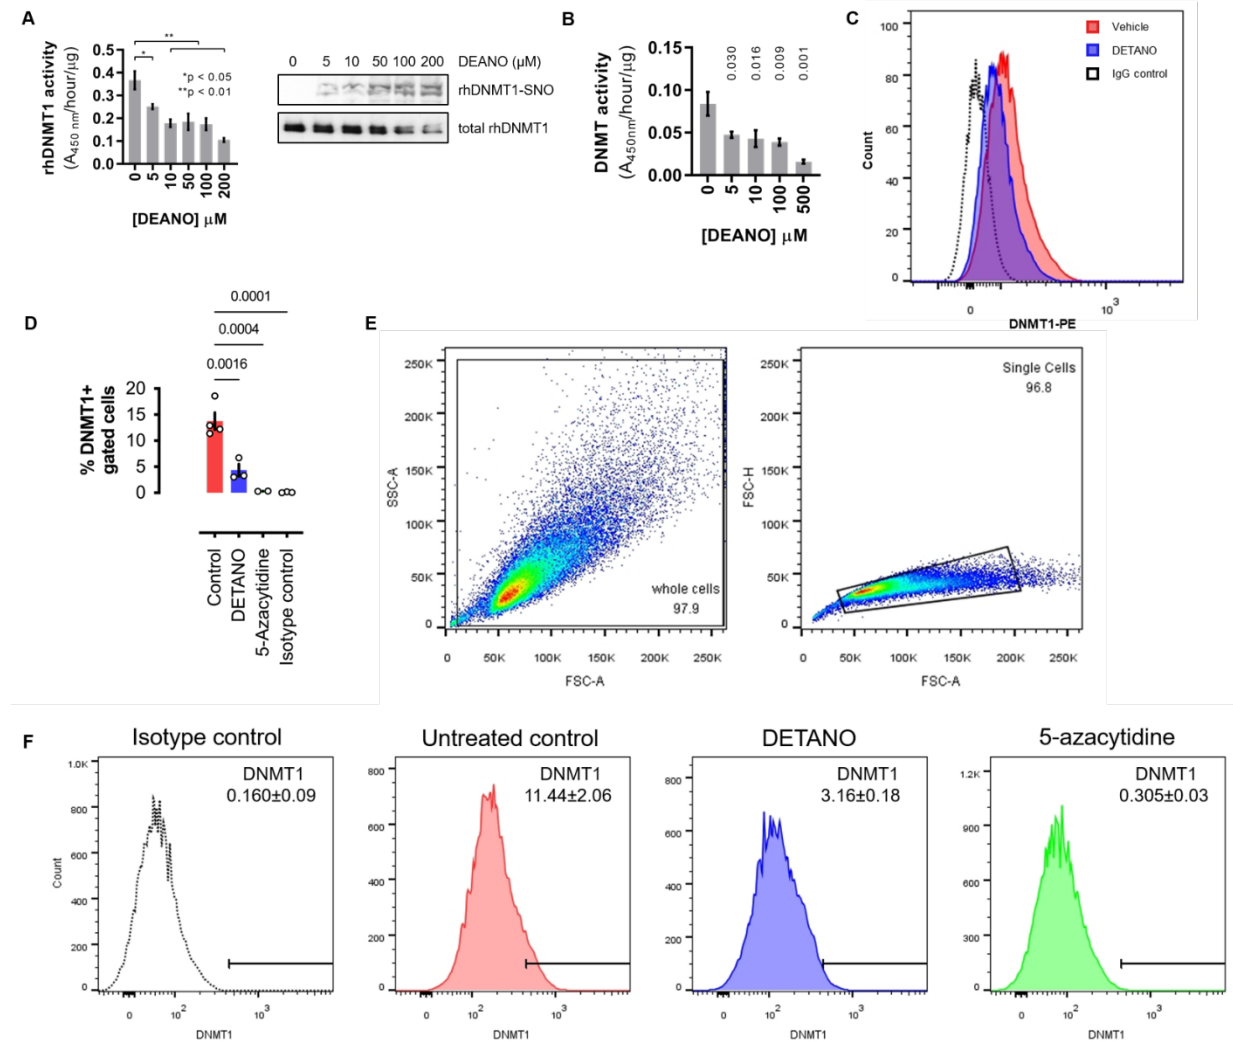

**Fig. S1.** NOS2 induces LINE-1 expression and DNA damage.

**A** Recombinant human DNMT1 activity treated with DEANO compared to vehicle (10 mM NaOH) treatment. Graph shows mean activity ( $\pm$ sem;  $n = 3$ ). Significance was calculated by one-way ANOVA with Dunnett's multiple comparisons test. Immunoblot showing DNMT1-SNO PTM and total DNMT1 from rhDNMT1 reacted with DEANO (100  $\mu$ M) or vehicle for 30 minutes. **B** Total cytosine methyltransferase activity from isolated nuclei treated with DEANO. Graph shows mean activity ( $\pm$ sem;  $n = 3$ ). Statistical significance from control was determined by one-way ANOVA with Dunnett's multiple comparison test and calculated P values are displayed above bars. **C** Cytometric histogram of DNMT1 expression in MDA-MB-231 cells treated with DETANO or vehicle and compared isotype control stained cells. **D** Graph depicting the mean percentages of gated DNMT1-positive MDA-MB-231 cells after indicated treatment ( $\pm$ sem;  $n = 2-4$ ). Gating strategy is shown in E and F. Statistical significance from control was determined by one-way ANOVA with Dunnett's multiple comparisons test. **E** Gating strategy for obtaining whole (left) and single cells (right) for DNMT1-PE analysis. **F** Histogram plots of untreated control MDA-MB-231, DETANO- and 5-azacytidine-treated cells stained with DNMT1-PE and IgG-PE isotype stained control cells. DNMT1-PE gating was established from the isotype control as shown by the horizontal bar. **G** Cell viability of cell lines treated with DETANO for 48 hours. Data shown are mean values ( $\pm$ sem;  $n = 3$ ). **H** DNMT3A protein expression in MDA-MB-231 cells treated with DETANO (300  $\mu$ M) or 5-azacytidine (5  $\mu$ M) for 48 hours. **I** Principle component analysis of Illumina MethylationEPIC bead chip array. **J** Immunoblot of relative DNMT1 protein expression in MDA-MB-231 cells treated with vehicle or DETANO and 1  $\mu$ M ODQ (soluble guanylyl cyclase inhibitor). Graph represents mean

normalized DNMT1 expression ( $\pm$ sem; n = 4). Significance was calculated by two-way ANOVA with Sidak multiple comparisons test. **K** Immunoblot of relative DNMT1 protein expression in MDA-MB-231 cells treated with DETANO or 8-pCPT-cGMP for 24 hours and compared to untreated cells. Graph represents mean normalized DNMT1 expression ( $\pm$ sem; n = 4). Statistical significance from control was determined by one-way ANOVA with Dunnett's multiple comparison test and calculated P values are displayed above bars. **L** Immunoblot of relative TET2 protein expression in MDA-MB-231 cells cultured with DETANO or vehicle for 48 hours. Graph depicts mean normalized DNMT1 expression levels ( $\pm$ sem; n = 3). Significance was calculated by two-tailed, unpaired t test. **M** TET activity from MDA-MB-231 cells treated with vehicle or DETANO for 48 hours. Mean activity is shown ( $\pm$ sem; n = 4). Significance was calculated by two-tailed, unpaired t test. **N** 5-hydroxymethylcytosine content from MDA-MB-231 cells treated with vehicle or DETANO for 48 hours. Data is shown as percent of total cytosine measured and mean percentages are displayed ( $\pm$ sem; n = 5). Significance was calculated by two-tailed, unpaired t test. **O** Immunoblot of relative DNMT1 and Myc-tag expression in MDA-MB-231 cells transiently transfected with empty vector or Myc-DNMT1 expression plasmid and then cultured with DETANO or vehicle for 48 hours. **P** 5-methylcytosine content ( $\beta$ ) from cells described in N ( $\beta$  = 5-methylcytosine/total cytosine). Graph represents mean 5mC content ( $\pm$ sem; n = 4). Significance was calculated by two-way ANOVA with Sidak multiple comparisons test. **Q** Representative immunoblot of NOS2 and DNMT1 protein expression in NOS2-GFP transfected MDA-MB-231 and MCF7 cell lines.

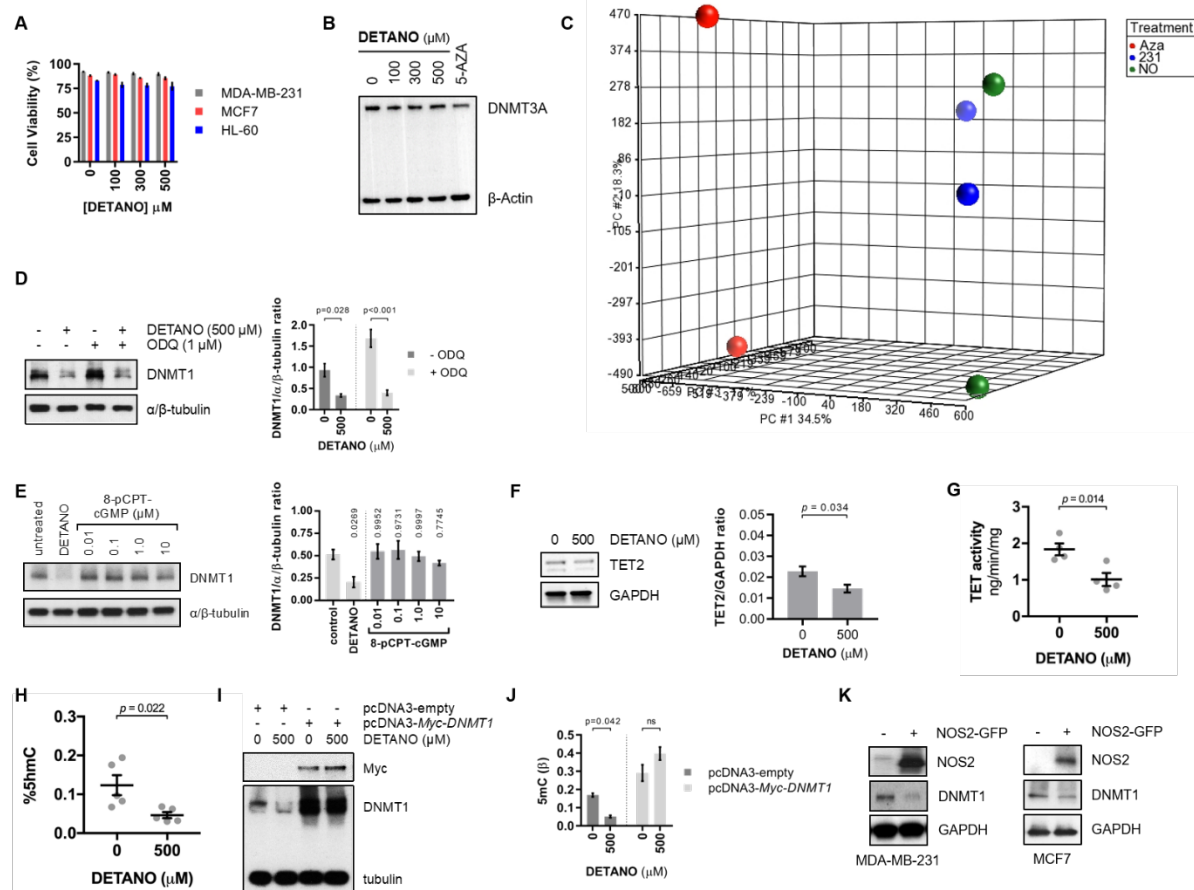

**Fig. S2. Non-canonical S-nitrosothiol (SNO) signaling induces passive DNA demethylation.**

**A** Cell viability of cell lines treated with DETANO for 48 hours. Data shown are mean values ( $\pm$ sem;  $n = 3$ ). **B** Relative DNMT3A protein expression in MDA-MB-231 cells treated with DETANO or 5-azacytidine for 48 hours. **C** Principle component analysis of Illumina MethylationEPIC bead chip array. **D** Immunoblot of relative DNMT1 protein expression in MDA-MB-231 cells treated with vehicle or DETANO and 1  $\mu$ M ODQ (soluble guanylyl cyclase inhibitor). Graph represents mean normalized DNMT1 expression ( $\pm$ sem;  $n = 4$ ). Significance was calculated by two-way ANOVA with Sidak multiple comparisons test. **E** Immunoblot of relative DNMT1 protein expression in MDA-MB-231 cells treated with DETANO or 8-pCPT-cGMP for 24 hours and compared to untreated cells. Graph represents mean normalized DNMT1 expression ( $\pm$ sem;  $n = 4$ ). Statistical significance from control was determined by one-way ANOVA with Dunnett's multiple comparison test and calculated P values are displayed above bars. **F** Immunoblot of relative TET2 protein expression in MDA-MB-231 cells cultured with DETANO or vehicle for 48 hours. Graph depicts mean normalized DNMT1 expression levels ( $\pm$ sem;  $n = 3$ ). Significance was calculated by two-tailed, unpaired t test. **G** TET activity from MDA-MB-231 cells treated with vehicle or DETANO for 48 hours. Mean activity is shown ( $\pm$ sem;  $n = 4$ ). Significance was calculated by two-tailed, unpaired t test. **H** 5-hydroxymethylcytosine content from MDA-MB-231 cells treated with vehicle or DETANO for 48 hours. Data is shown as percent of total cytosine measured and mean percentages are displayed ( $\pm$ sem;  $n = 5$ ). Significance was calculated by two-tailed, unpaired t test. **I** Immunoblot of relative DNMT1 and Myc-tag expression in MDA-MB-231 cells transiently transfected with empty vector or Myc-DNMT1 expression plasmid and then cultured with DETANO or vehicle for 48 hours. **J** 5-methylcytosine content ( $\beta$ ) from cells described in N ( $\beta = 5$ -methylcytosine/total cytosine). Graph represents mean 5mC content ( $\pm$ sem;  $n = 4$ ). Significance was calculated by two-way ANOVA with Sidak multiple comparisons test. **K** Immunoblots of NOS2 and DNMT1 protein expression in MCF7 and MDA-MB-231 cells 48 hours after transfection with or without NOS-GFP plasmid.

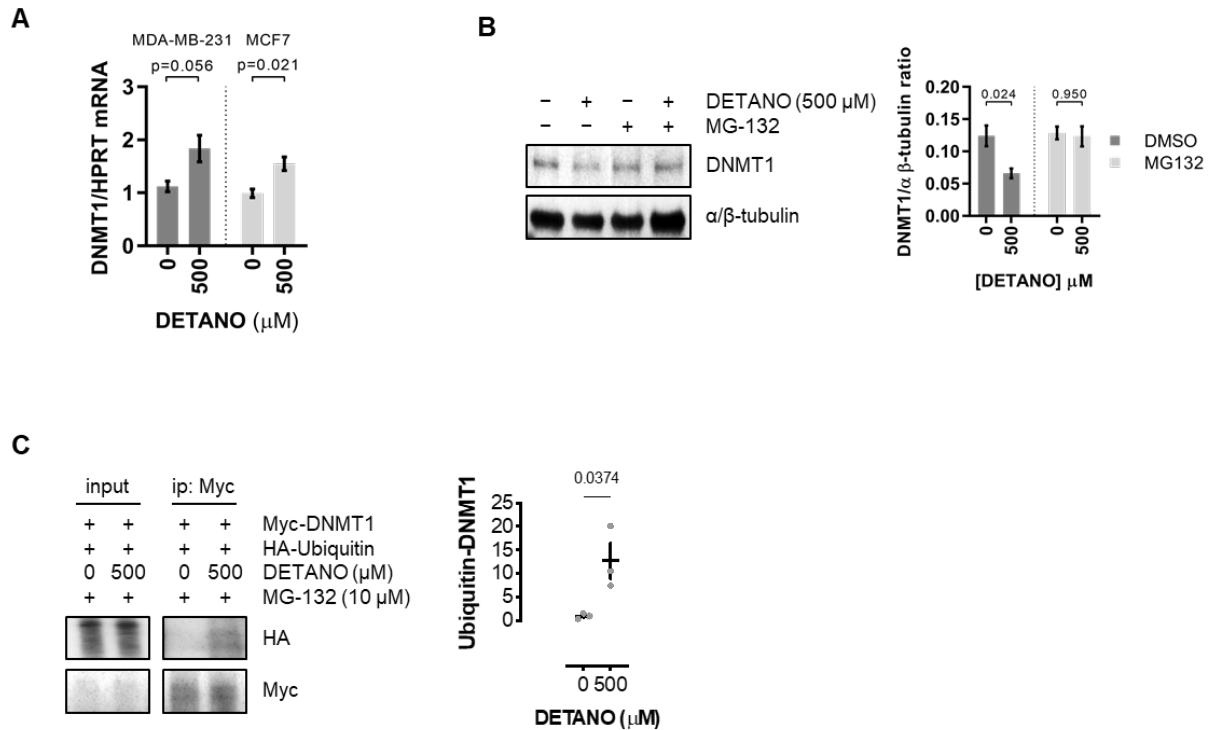

**Fig. S3.** SNO signaling induces DNMT1 protein degradation.

**A** Relative DNMT1 mRNA expression in MDA-MB-231 and MCF7 cells cultured with DETANO or vehicle for 48 hours. Graph shows mean expression ( $\pm$ sem;  $n = 3$ ) and significance was calculated by two-tailed, unpaired t test. **B** Immunoblot and graph showing relative DNMT1 expression in MDA-MB-231 cells treated with DETANO and/or MG-132 (10  $\mu$ M) compared to vehicle control. Graph shows mean expression ( $\pm$ sem;  $n = 4$ ) and significance was calculated by two-way ANOVA with Sidak multiple comparisons test. **C** Immunoblots of input and Myc-tag immunoprecipitated lysates from HEK293 cells expressing Myc-DNMT1 and HA-Ubiquitin and treated with vehicle or DETANO and MG132. Graph shows mean HA normalized to Myc intensities ( $\pm$ sem;  $n = 3$ ) and significance was calculated by two-tailed, unpaired t test.

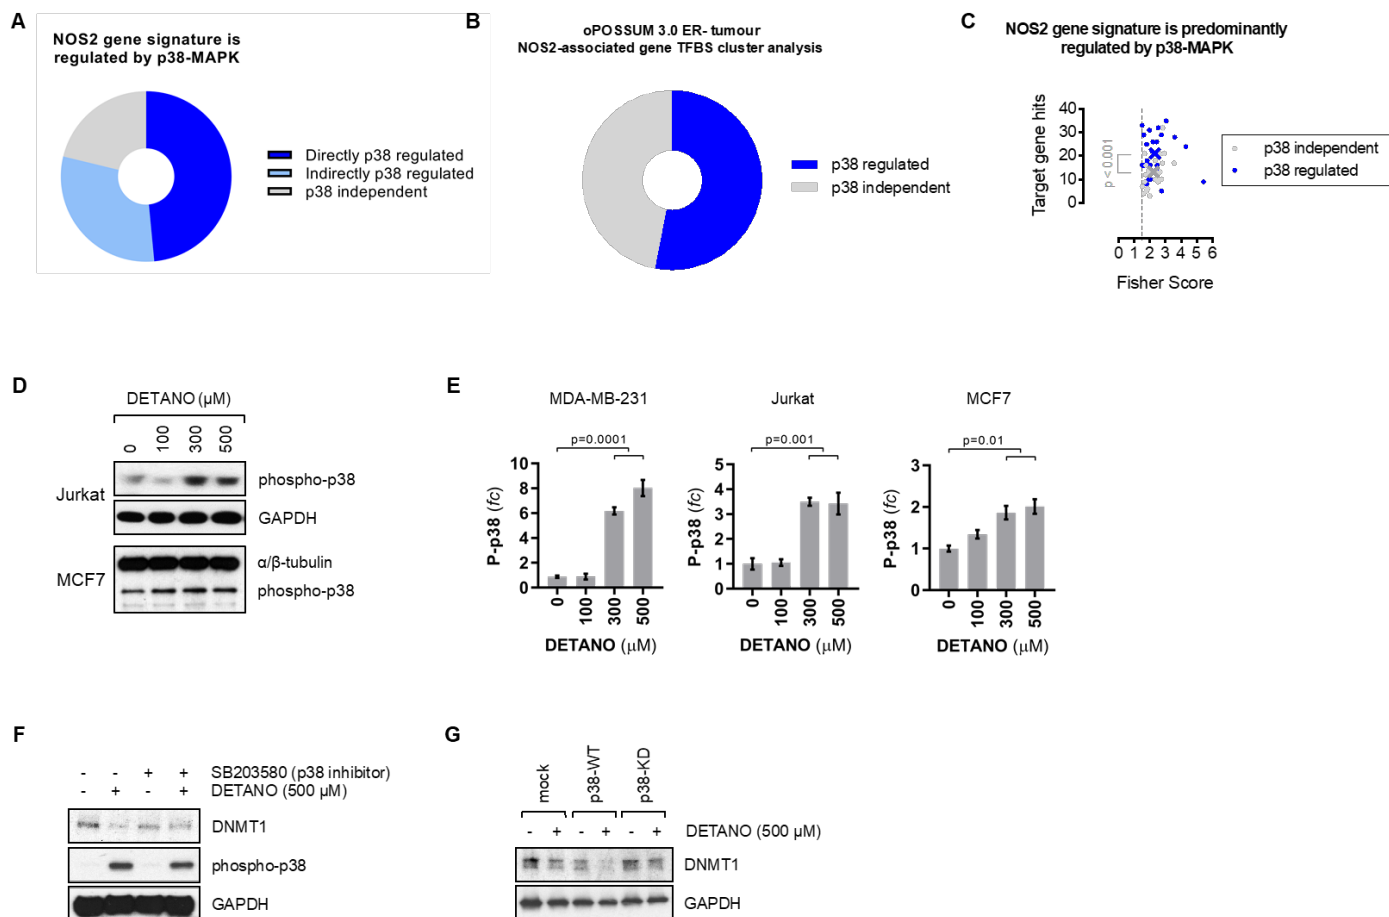

**Fig. S4.** p38-MAPK mediates NOS2-induced DNMT1 degradation.

**A** Graph depicting the relative number of NOS2-associated upregulated genes (Additional File 1, Supplementary Table S4) that are either directly or indirectly controlled by p38-MAPK activity identified from the TRANSFAC database (Additional File 1, Supplementary Table S5). **B** Graph depicting the relative number of NOS2-associated upregulated genes (Additional File 1, Supplementary Table S4) that are controlled by p38-MAPK activity identified from the oPOSSUM database (Additional File 1, Supplementary Table S6). **C** Relative contribution of p38-regulated compared to p38-independent transcription factors in the NOS2-associated gene signature. The graph depicts Fisher score compared to the number of gene hits from oPOSSUM transcription factor cluster analysis grouped into p38-independent (grey) and p38-regulated (blue) transcription factor families. X represent the mean of each group and statistical difference between the means was calculated by unpaired, two-tailed t test. **D** Immunoblots of relative phospho-p38 (Thr180/Tyr182) expression in Jurkat and MCF7 cells cultured with DETANO for 48 hours. **E** Densitometric analyses of phospho-p38 (Thr180/Tyr182) expression in human cell lines cultured with DETANO for 48 hours. Data shows mean normalized phospho-p38 expression as fold change of controls ( $\pm$ sem; n = 3-6). Significance was calculated by one-way ANOVA with Dunnett's multiple comparisons test. **F** Immunoblots of relative DNMT1 and phospho-p38 (Thr180/Tyr182) expression in MDA-MB-231 cells cultured for 24 hours with or without DETANO or 10  $\mu$ M SB203580 (p38 inhibitor). **G** Immunoblot of relative DNMT1 expression in vehicle- or DETANO-treated HEK293 cells expressing wild-type or inactive p38a and compared to mock transfected cells.

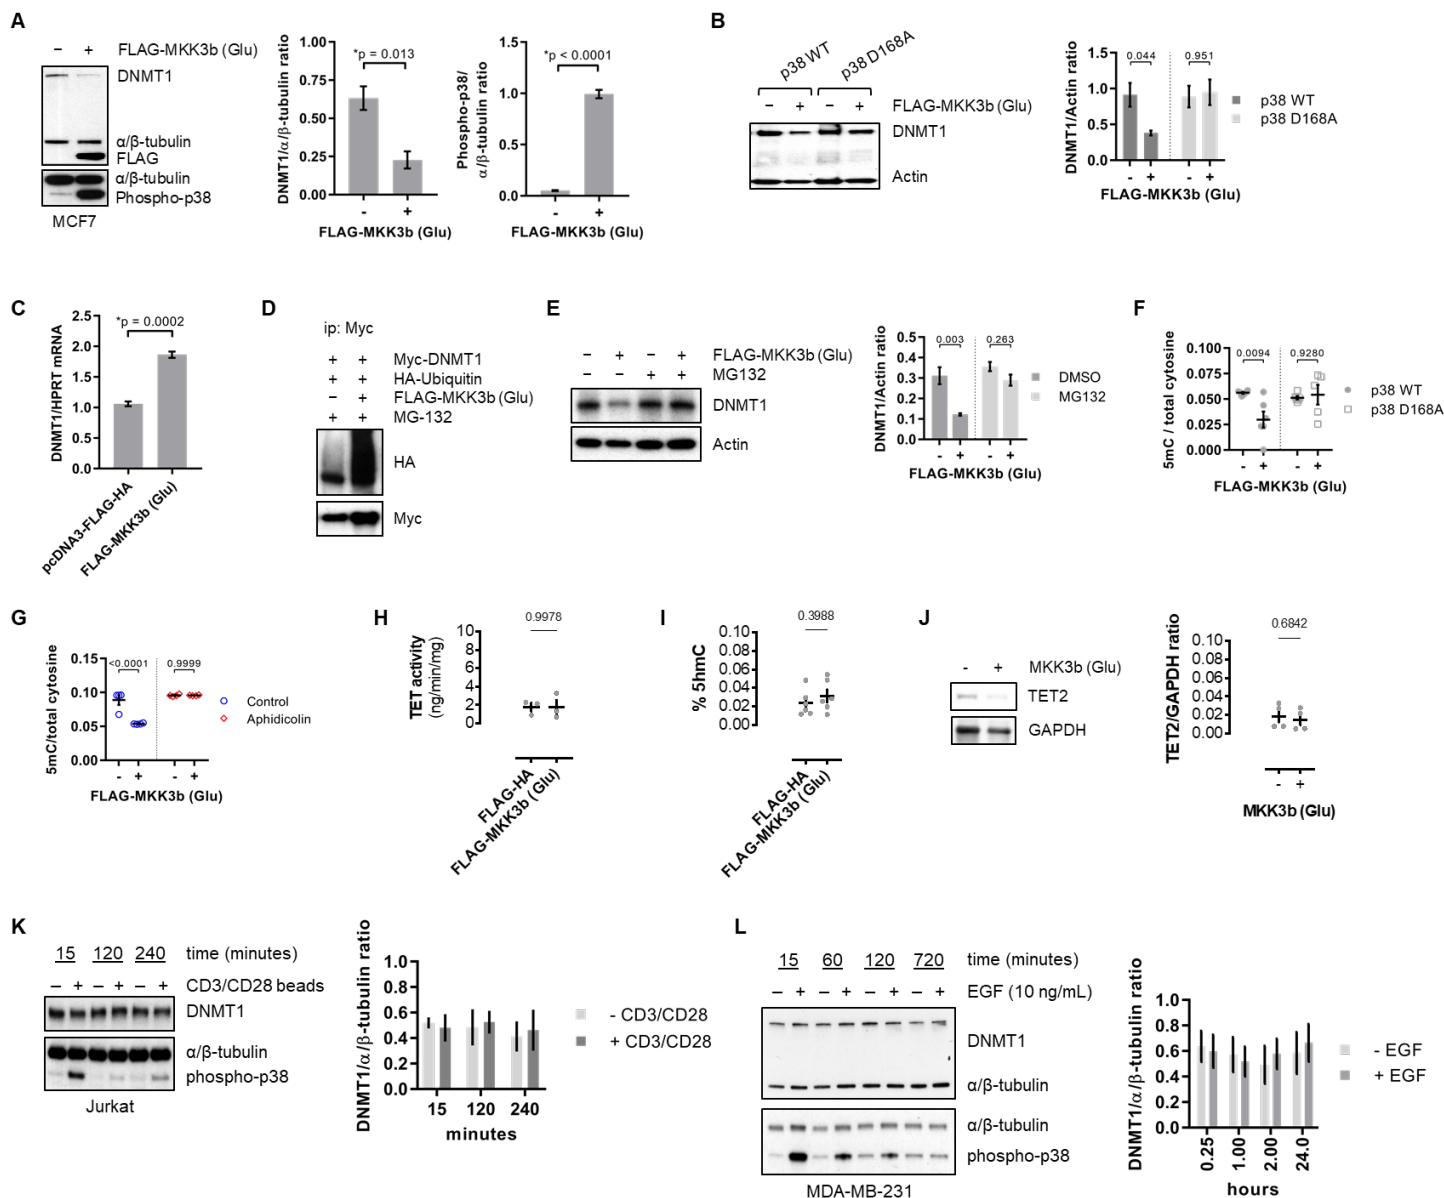

**Fig. S5.** Direct p38 activation induces passive demethylation.

**A** Immunoblot of relative DNMT1, phospho-p38 and FLAG-tag expression in MCF7 cells transfected with control or FLAG-MKK3b (Glu) plasmids. Graphs depict mean normalized DNMT1 and phospho-p38 expression ( $\pm$ sem;  $n = 3$ ) and significance was calculated by two-tailed, unpaired t test. **B** Immunoblot of relative DNMT1 expression in HEK293 cells co-transfected with either control or FLAG-MKK3b (Glu) plasmids and either wild-type or inactive p38. Graph shows mean normalized DNMT1 expression ( $\pm$ sem;  $n = 3$ ) and significance was calculated by two-way ANOVA with Sidak's multiple comparisons test. **C** Relative DNMT1 mRNA expression in HEK293 cells transfected with control or MKK3b (Glu) plasmids. Graph depicts mean expression values ( $\pm$ sem;  $n = 3$ ). Significance was calculated by two-tailed, unpaired t test. **D** Immunoblots showing DNMT1 ubiquitination in control or MKK3b (Glu) expressing HEK293 cells. Cells were co-transfected with Myc-DNMT1, HA-ubiquitin and either control or FLAG-MKK3b (Glu) and incubated with MG132 for 3 hours. **E** Immunoblot of relative DNMT1 expression in control or MKK3b (Glu) expressing HEK293 cells treated with vehicle or MG132 for 3 hours. Graph shows mean normalized DNMT1

expression ( $\pm$ sem; n = 3) and significance was calculated by two-way ANOVA with Sidak's multiple comparisons test. **F** 5-methylcytosine content from HEK293 cells co-transfected with control or MKK3b (Glu) and wild-type or inactive mutant p38 expression plasmids. Graph shows mean values ( $\pm$ sem; n = 6) and significance was calculated by two-way ANOVA with Sidak's multiple comparisons test. **G** 5-methylcytosine content from HEK293 cells transfected with either control or MKK3b (Glu) plasmids and incubated with or without aphidicolin. Graph shows mean values ( $\pm$ sem; n = 6) and significance was calculated by two-way ANOVA with Sidak's multiple comparisons test. **H** TET enzymatic activity from cells transfected with control or MKK3b (Glu) plasmids. Graph shows mean activity ( $\pm$ sem; n = 3) and significance was calculated by two-tailed, unpaired t test. **I** 5-hydroxymethylcytosine content from HEK293 cells transfected with either control or MKK3b (Glu) plasmids. Graph shows mean activity ( $\pm$ sem; n = 6) and significance was calculated by two-tailed, unpaired t test. **J** Immunoblot of TET2 expression in HEK293 cells transfected with either control or MKK3b (Glu) plasmids. Graph shows mean expression ( $\pm$ sem; n = 4) and significance was calculated by two-tailed, unpaired t test. **K** Immunoblot of relative DNMT1 and phospho-p38 (Thr180/Tyr182) expression in Jurkat cells stimulated with CD3/CD28 beads for the indicated times. Graph shows mean normalized DNMT1 expression ( $\pm$ sem; n = 3). **L** Immunoblot of relative DNMT1 and phospho-p38 (Thr180/Tyr182) expression in MDA-MB-231 cells stimulated with recombinant human EGF for the indicated times. Graph shows mean normalized DNMT1 expression ( $\pm$ sem; n = 3).

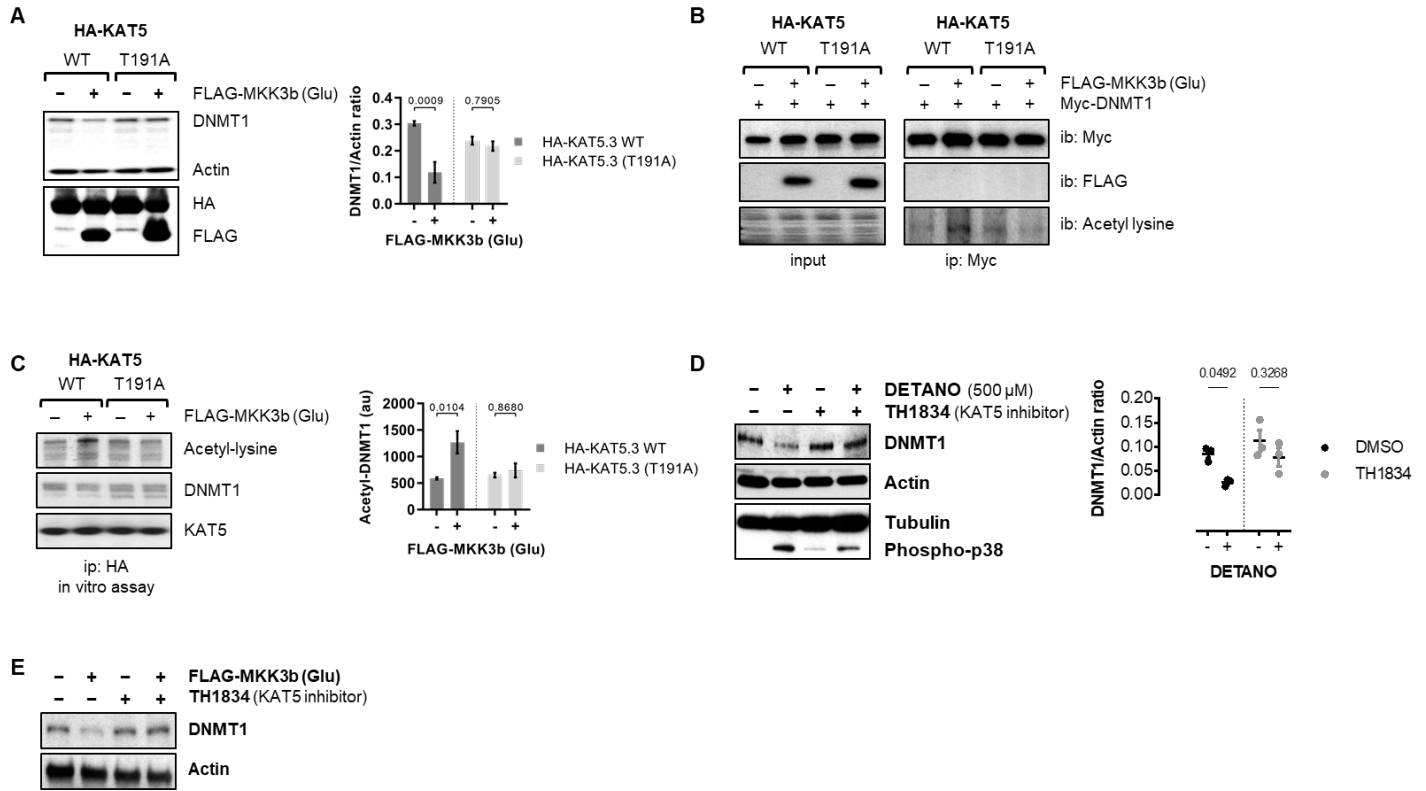

**Fig. S6.** p38 signaling induces passive DNA demethylation via KAT5 activation.

**A** Immunoblot showing relative DNMT1 protein and FLAG- and HA-epitope expression in HEK293 cells co-transfected with either WT or T191A HA-KAT5 and control or FLAG-MKK3b (Glu) plasmids. Graph shows mean normalized DNMT1 expression ( $\pm$ sem;  $n = 3$ ) and significance was calculated by two-way ANOVA with Sidak's multiple comparisons test. **B** Immunoblots of Myc-DNMT1, FLAG and acetyl-lysine from input and Myc-tag immunoprecipitated lysate from HEK293 cells co-expressing Myc-DNMT1 and either HA-KAT5 WT or HA-KAT5 (T191A) and control or FLAG-MKK3b (Glu) plasmids. **C** DNMT1 acetyl-lysine formation in an in vitro acetyltransferase activity assay using HA-immunoprecipitated KAT5 from WT or T191A expressing cells which have been co-transfected with either control or FLAG-MKK3b (Glu) plasmids. Densitometric analysis shows mean acetylation ( $\pm$ sem;  $n = 3$ ) and significance was determined by two-way ANOVA with Sidak's multiple comparisons test. **D** DNMT1 protein expression in MDA-MB-231 cells treated with vehicle or DETANO and cultured with the KAT5-specific inhibitor TH1834 (50  $\mu$ M) or vehicle. Graph shows normalized mean densitometric values ( $\pm$ sem;  $n = 3$ ) and significance was determined by two-way ANOVA with Sidak's multiple comparisons test. **E** DNMT1 protein expression in MCF7 cells transfected with either control or FLAG-MKK3b (Glu) plasmids and treated with vehicle or TH1834.

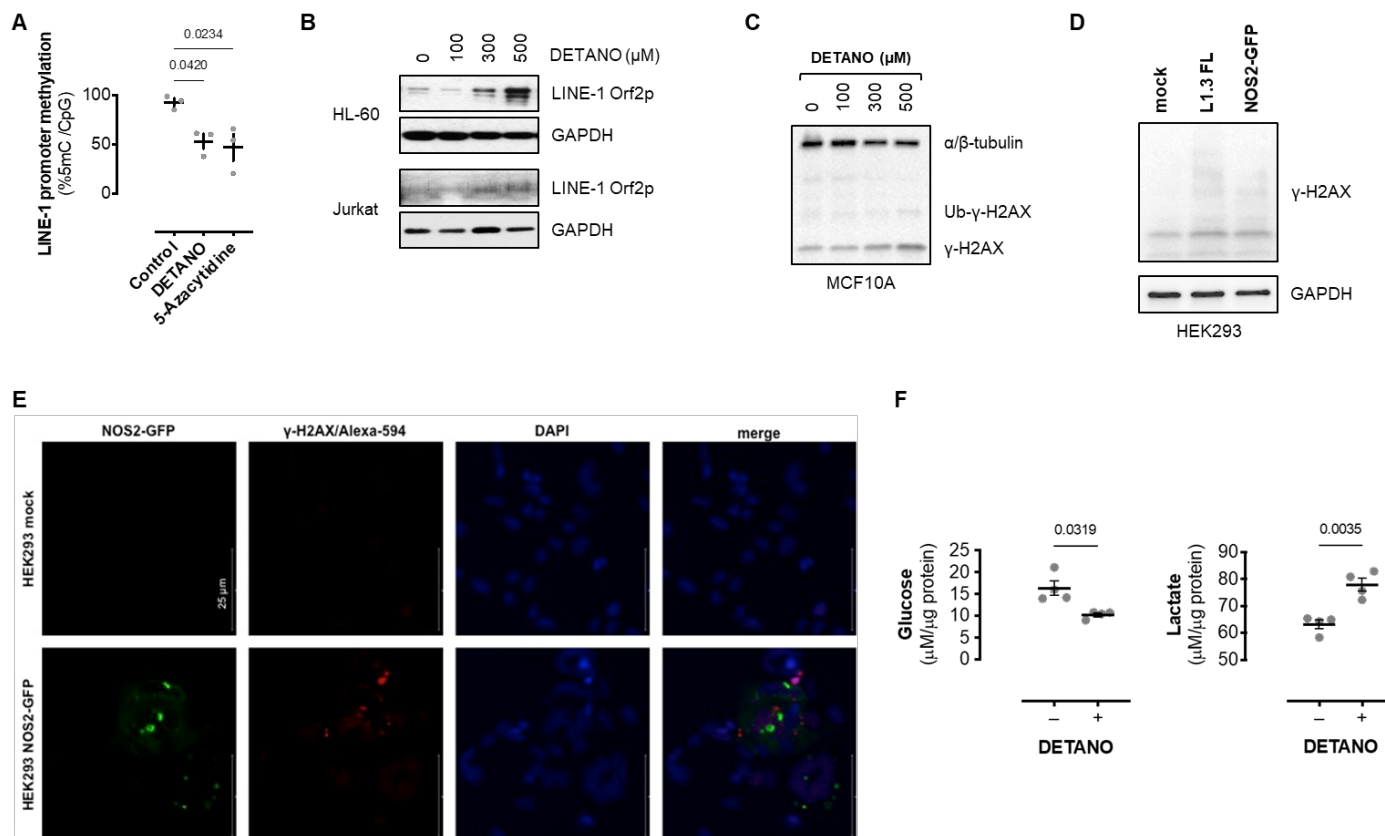

**Fig. S7.** NOS2 induces LINE-1 expression and DNA damage.

**A** LINE-1 promoter methylation in MDA-MB-231 cells treated with DETANO (300  $\mu$ M) or 5-azacytidine (1  $\mu$ M) for 48 hours. Data shown represent the mean % 5-mC associated per CpG cytosine residues ( $\pm$ sem; n=3). Significance was calculated by one-way ANOVA with Dunnett's multiple comparisons test. **B** Immunoblots of relative LINE-1 Orf2p expression from HL-60 or Jurkat cell lines cultured with DETANO or vehicle for 48 hours. **C** Immunoblot of relative  $\gamma$ -H2AX expression from MCF10A cells cultured with DETANO or vehicle for 48 hours. **D** Immunoblot of relative  $\gamma$ -H2AX expression from HEK293 cells 48 hours after transfection with either full-length human L1.3 element or NOS2-GFP plasmids. **E** Immunofluorescent images of formalin-fixed HEK293 cells that have been mock or NOS2-GFP transfected. NOS2 and  $\gamma$ -H2AX expression are displayed individually and merged with DAPI counterstain. Images recorded at 20X magnification and white bar represents 25  $\mu$ m. **F** Graphs showing mean glucose and lactate in culture media from MCF10A control or NO-transformed cells after 96 hours in culture. Data shown are mean normalized concentrations ( $\pm$ sem; n=4) and significance calculated by unpaired, two-way *t* test.

**Table S1.** Promoter methylation of NOS2-associated genes.**Table S1. Promoter methylation of NOS2-associated genes**

| GenBankID | Gene Symbol | Fold Change | p value | TSS CGI<br>(UCSC<br>hg38) |
|-----------|-------------|-------------|---------|---------------------------|
| AL569511  | KRT6A/B/C/E | 52.7        | 0.002   | –                         |
| J00269    | KRT6A/C/E   | 42.1        | 0.002   | –                         |
| NM_021804 | ACE2        | 17          | 0.005   | –                         |
| L42612    | KRT6B       | 15.9        | 0.001   | –                         |
| AI831452  | KRT6B       | 14.3        | <0.001  | –                         |
| NM_025087 | FLJ21511    | 12.2        | 0.001   | +                         |
| NM_000422 | KRT17       | 8.6         | 0.009   | –                         |
| Z19574    | KRT17       | 8.3         | 0.005   | –                         |
| NM_000584 | IL8         | 6.8         | 0.003   | –                         |
| NM_003064 | SLPI        | 6           | 0.001   | –                         |
| NM_018004 | TMEM45A     | 5.6         | 0.001   | +                         |
| NM_002964 | S100A8      | 5           | 0.01    | –                         |
| L25541    | LAMB3       | 4.9         | 0.002   | –                         |
| NM_001793 | CDH3        | 4.3         | 0.005   | +                         |
| AB018009  | SLC7A5      | 4.2         | 0.008   | +                         |
| NM_018455 | C16orf60    | 4.1         | 0.002   | +                         |
| X57348    | SFN         | 4           | 0.001   | +                         |
| NM_001630 | ANXA8       | 3.9         | 0.006   | +                         |
| NM_005629 | SLC6A8      | 3.9         | 0.006   | +                         |
| NM_012101 | TRIM29      | 3.8         | 0.002   | +                         |
| NM_002061 | GCLM        | 3.4         | <0.001  | +                         |
| AF132818  | KLF5        | 3.4         | <0.001  | +                         |
| NM_022121 | PERP        | 3.4         | 0.003   | +                         |
| NM_003878 | GGH         | 3.2         | 0.004   | +                         |
| NM_007196 | KLK8        | 3.2         | 0.002   | +                         |
| NM_016593 | CYP39A1     | 3.1         | 0.01    | +                         |
| NM_003662 | PIR         | 3           | 0.002   | +                         |
| NM_001047 | SRD5A1      | 2.9         | 0.003   | +                         |
| X57348    | SFN         | 2.8         | 0.005   | +                         |
| NM_005342 | HMGB3       | 2.8         | 0.002   | +                         |
| NM_006623 | PHGDH       | 2.7         | 0.002   | +                         |
| AV712602  | PTPLB       | 2.6         | <0.001  | +                         |
| X16447    | CD59        | 2.5         | 0.001   | +                         |
| NM_003392 | WNT5A       | 2.4         | 0.002   | +                         |
| NM_000611 | CD59        | 2.4         | 0.002   | +                         |
| BE964473  | RPE         | 2.3         | 0.001   | +                         |
| NM_000050 | ASS         | 2.3         | 0.008   | +                         |
| NM_002633 | PGM1        | 2.1         | 0.003   | +                         |
| D84454    | SLC35A2     | 2.1         | 0.002   | +                         |
| BF116254  | TPI1        | 2           | 0.001   | +                         |
| NM_005333 | HCCS        | 2           | 0.001   | +                         |
| NM_001428 | ENO1        | 2           | <0.001  | +                         |
| NM_000610 | CD44        | 2           | 0.003   | +                         |
| BF939365  | CALU        | 1.9         | 0.002   | +                         |
| NM_014637 | MTFR1       | 1.9         | 0.004   | +                         |
| NM_000365 | TPI1        | 1.9         | 0.002   | +                         |
| AF289489  | ASPH        | 1.9         | 0.006   | +                         |
| BC003375  | MRPL3       | 1.8         | 0.002   | +                         |
| AI186712  | PPP1CB      | 1.7         | <0.001  | +                         |

**Table S2.** Patient metadata.

**Table S2. Patient metadata**

| n                          | Tumor NOS2       |                   | p value <sup>1</sup> |
|----------------------------|------------------|-------------------|----------------------|
|                            | <u>Low</u><br>10 | <u>High</u><br>43 |                      |
| Ethnicity                  |                  |                   |                      |
| WestAfrican                | 0.446            | 0.398             | 0.756                |
| NativeAm                   | 0.016            | 0.003             | 0.419                |
| European                   | 0.538            | 0.599             | 0.704                |
| Age                        | 54.4             | 52.7              | 0.817                |
| Education <sup>2</sup>     | 1                | 1                 | 0.912                |
| Income <sup>2</sup>        | 1.2              | 1                 | 0.415                |
| Smoking (pack years)       | 17.1             | 14.2              | 0.797                |
| BMI rank <sup>2</sup>      | 1.5              | 0.976             | 0.061                |
| Survival (months)          | 67.5             | 54.8              | 0.48                 |
| Tumour stage               | 1.4              | 1.14              | 0.179                |
| ER expression <sup>3</sup> | 0.7              | 0.45              | 0.17                 |

<sup>1</sup> p value calculated from two-tailed heteroscedastic t test

<sup>2</sup> Rankings are described in Terunuma A, et al. The Journal of Clinical Investigation 2014, 124(1):398-412.

<sup>3</sup> ER-positive = 1; ER-negative = 0

**Table S3.** TRANSFAC analysis: ER-negative NOS2 gene signature.

| Gene set | Gene set name         | score  | p value | FDR    |                          |
|----------|-----------------------|--------|---------|--------|--------------------------|
| 188      | V\$AML1_Q1            | 0.3401 | 0.0067  | 0.5486 | Directly p38 regulated   |
| 377      | V\$COREBINDINGFACTOR_ | 0.4361 | 0.0067  | 0.5486 |                          |
| 135      | V\$CEBP_Q2            | 0.216  | 0.0133  | 0.5486 |                          |
| 557      | RACCACAR_V\$AML_Q6    | 0.3732 | 0.0133  | 0.5486 |                          |
| 268      | V\$STAT5A_Q1          | 0.2414 | 0.0167  | 0.5486 |                          |
| 409      | V\$AML_Q6             | 0.3472 | 0.0167  | 0.5486 |                          |
| 269      | V\$STAT5B_Q1          | 0.283  | 0.02    | 0.5486 |                          |
| 339      | V\$HOXA4_Q2           | 0.1717 | 0.02    | 0.5486 |                          |
| 611      | TTCYNRGAA_V\$STAT5B_Q | 0.1958 | 0.0233  | 0.6109 |                          |
| 162      | V\$STAT3_Q1           | 0.6984 | 0.03    | 0.6912 |                          |
| 213      | V\$ETS1_B             | 0.2795 | 0.03    | 0.6912 |                          |
| 344      | V\$MAF_Q6             | 0.2    | 0.03    | 0.6912 |                          |
| 411      | V\$ETS_Q4             | 0.3525 | 0.04    | 0.7131 |                          |
| 206      | V\$NFAT_Q6            | 0.1804 | 0.0433  | 0.7131 |                          |
| 72       | V\$CEBPB_Q1           | 0.2123 | 0       | 0      |                          |
| 444      | V\$CEBP_Q2_Q1         | 0.2201 | 0.04    | 0.7131 |                          |
| 121      | V\$AP1_Q6             | 0.1654 | 0.0033  | 0.5486 | Indirectly p38-regulated |
| 400      | V\$AML1_Q6            | 0.3401 | 0.0067  | 0.5486 |                          |
| 214      | V\$ETS2_B             | 0.3049 | 0.01    | 0.5486 |                          |
| 140      | V\$NFKB_Q6            | 0.329  | 0.0133  | 0.5486 |                          |
| 120      | V\$AP1_Q2             | 0.1708 | 0.04    | 0.7131 |                          |
| 396      | V\$ELF1_Q6            | 0.4535 | 0.01    | 0.5486 |                          |
| 170      | V\$NKX25_Q2           | 0.2429 | 0.0133  | 0.5486 |                          |
| 603      | RGAGGAARY_V\$PU1_Q6   | 0.3258 | 0.0133  | 0.5486 |                          |
| 352      | V\$PU1_Q6             | 0.3953 | 0.02    | 0.5486 |                          |
| 397      | V\$IRF1_Q6            | 0.2665 | 0.02    | 0.5486 |                          |
| 384      | V\$OSF2_Q6            | 0.1809 | 0.0133  | 0.5486 | p38-independent          |
| 202      | V\$FREAC4_Q1          | 0.2742 | 0.0167  | 0.5486 |                          |
| 224      | V\$MSX1_Q1            | 0.2091 | 0.0167  | 0.5486 |                          |
| 320      | V\$RP58_Q1            | 0.2973 | 0.0367  | 0.7131 |                          |
| 104      | V\$BRN2_Q1            | 0.1719 | 0.04    | 0.7131 |                          |
| 275      | V\$POU6F1_Q1 (BRN5)   | 0.2099 | 0.0433  | 0.7131 |                          |
| 385      | V\$SMAD4_Q6           | 0.112  | 0.0467  | 0.7467 |                          |

**Table S4.** NOS2-associated gene expression oPOSSUM transcription factor analysis.

| TFBS<br>Cluster ID | Class                   | Family                    | Target gene hits | Target gene non-hits | Target cluster hits | Target nucleotide rate | Z-score | Fisher score | Members*                                                                                                                                                                                                                                                                                                                                                                                                                                                                                                                                                                                                                                                                                                                                                                                                                                                                                                                                                                                                                                                                                                                                                                                                                                                                                                                                                                                                                                                                                                                                                                                                                                                                                                                                                                                                                                                                                                                                                                                                                                                                                                                                                                                                                                                                                                                                                                                                                                                                                                                                                                                                                                                                                                                                                                                                                                                                                                                                                                                                                                                                                                                                                                                                                                                                                                                                                                                                                                                                                                                                                                                                                                                                                                                                                                                                                                                                                                                                                                                                                                                                                                                                                                                                                                                                                                                                                                                                                                                                                                                                                                                                                                                                                                                                                                                                                                                                                                                                                                                                                                                                                                                                                                                                                                                                                                                                                                                                                                                                                                                                                                                                                                                                                                                                                                                                                                                                                                                                                                                                                                                                                                                                                                                                                                                                                                                                                                                                                                                                                                                                                                                                                                                                                                                                                                                                                                                                                                                                                                                                                                                                                                                                                                                                                                                                                                                                                                                                                                                                                                                                                                                                                                                                                                                                                                                                                                                                                                                                                                                                                                                                                                                                                                                                                                                                                                                                                                                                                                                                                                                                                                                                                                                                                                                                                                                                                                                                                                                                                                                                                                                                                                                                                                                                                                       | Consensus LINE-1 5'-UTR (ref) |
|--------------------|-------------------------|---------------------------|------------------|----------------------|---------------------|------------------------|---------|--------------|------------------------------------------------------------------------------------------------------------------------------------------------------------------------------------------------------------------------------------------------------------------------------------------------------------------------------------------------------------------------------------------------------------------------------------------------------------------------------------------------------------------------------------------------------------------------------------------------------------------------------------------------------------------------------------------------------------------------------------------------------------------------------------------------------------------------------------------------------------------------------------------------------------------------------------------------------------------------------------------------------------------------------------------------------------------------------------------------------------------------------------------------------------------------------------------------------------------------------------------------------------------------------------------------------------------------------------------------------------------------------------------------------------------------------------------------------------------------------------------------------------------------------------------------------------------------------------------------------------------------------------------------------------------------------------------------------------------------------------------------------------------------------------------------------------------------------------------------------------------------------------------------------------------------------------------------------------------------------------------------------------------------------------------------------------------------------------------------------------------------------------------------------------------------------------------------------------------------------------------------------------------------------------------------------------------------------------------------------------------------------------------------------------------------------------------------------------------------------------------------------------------------------------------------------------------------------------------------------------------------------------------------------------------------------------------------------------------------------------------------------------------------------------------------------------------------------------------------------------------------------------------------------------------------------------------------------------------------------------------------------------------------------------------------------------------------------------------------------------------------------------------------------------------------------------------------------------------------------------------------------------------------------------------------------------------------------------------------------------------------------------------------------------------------------------------------------------------------------------------------------------------------------------------------------------------------------------------------------------------------------------------------------------------------------------------------------------------------------------------------------------------------------------------------------------------------------------------------------------------------------------------------------------------------------------------------------------------------------------------------------------------------------------------------------------------------------------------------------------------------------------------------------------------------------------------------------------------------------------------------------------------------------------------------------------------------------------------------------------------------------------------------------------------------------------------------------------------------------------------------------------------------------------------------------------------------------------------------------------------------------------------------------------------------------------------------------------------------------------------------------------------------------------------------------------------------------------------------------------------------------------------------------------------------------------------------------------------------------------------------------------------------------------------------------------------------------------------------------------------------------------------------------------------------------------------------------------------------------------------------------------------------------------------------------------------------------------------------------------------------------------------------------------------------------------------------------------------------------------------------------------------------------------------------------------------------------------------------------------------------------------------------------------------------------------------------------------------------------------------------------------------------------------------------------------------------------------------------------------------------------------------------------------------------------------------------------------------------------------------------------------------------------------------------------------------------------------------------------------------------------------------------------------------------------------------------------------------------------------------------------------------------------------------------------------------------------------------------------------------------------------------------------------------------------------------------------------------------------------------------------------------------------------------------------------------------------------------------------------------------------------------------------------------------------------------------------------------------------------------------------------------------------------------------------------------------------------------------------------------------------------------------------------------------------------------------------------------------------------------------------------------------------------------------------------------------------------------------------------------------------------------------------------------------------------------------------------------------------------------------------------------------------------------------------------------------------------------------------------------------------------------------------------------------------------------------------------------------------------------------------------------------------------------------------------------------------------------------------------------------------------------------------------------------------------------------------------------------------------------------------------------------------------------------------------------------------------------------------------------------------------------------------------------------------------------------------------------------------------------------------------------------------------------------------------------------------------------------------------------------------------------------------------------------------------------------------------------------------------------------------------------------------------------------------------------------------------------------------------------------------------------------------------------------------------------------------------------------------------------------------------------------------------------------------------------------------------------------------------------------------------------------------------------------------------------------------------------------------------------------------------------------------------------------------------------------------------------------------------------------------------------------------------------------------------------------------------------------------------------------------------------------------------------------------------------------------------------------------------------------------------------------------------------------------------------------------------------------------------------------|-------------------------------|
| c109               | Helix-Turn-Helix        | Myb                       | 9                | 30                   | 11                  | 0.00296                | 12.487  | 5.446        | Myb_1 Myb1                                                                                                                                                                                                                                                                                                                                                                                                                                                                                                                                                                                                                                                                                                                                                                                                                                                                                                                                                                                                                                                                                                                                                                                                                                                                                                                                                                                                                                                                                                                                                                                                                                                                                                                                                                                                                                                                                                                                                                                                                                                                                                                                                                                                                                                                                                                                                                                                                                                                                                                                                                                                                                                                                                                                                                                                                                                                                                                                                                                                                                                                                                                                                                                                                                                                                                                                                                                                                                                                                                                                                                                                                                                                                                                                                                                                                                                                                                                                                                                                                                                                                                                                                                                                                                                                                                                                                                                                                                                                                                                                                                                                                                                                                                                                                                                                                                                                                                                                                                                                                                                                                                                                                                                                                                                                                                                                                                                                                                                                                                                                                                                                                                                                                                                                                                                                                                                                                                                                                                                                                                                                                                                                                                                                                                                                                                                                                                                                                                                                                                                                                                                                                                                                                                                                                                                                                                                                                                                                                                                                                                                                                                                                                                                                                                                                                                                                                                                                                                                                                                                                                                                                                                                                                                                                                                                                                                                                                                                                                                                                                                                                                                                                                                                                                                                                                                                                                                                                                                                                                                                                                                                                                                                                                                                                                                                                                                                                                                                                                                                                                                                                                                                                                                                                                                     |                               |
| c16                | Ig-fold                 | Stat                      | 24               | 15                   | 51                  | 0.00975                | 1.975   | 4.321        | Stat3 STAT1                                                                                                                                                                                                                                                                                                                                                                                                                                                                                                                                                                                                                                                                                                                                                                                                                                                                                                                                                                                                                                                                                                                                                                                                                                                                                                                                                                                                                                                                                                                                                                                                                                                                                                                                                                                                                                                                                                                                                                                                                                                                                                                                                                                                                                                                                                                                                                                                                                                                                                                                                                                                                                                                                                                                                                                                                                                                                                                                                                                                                                                                                                                                                                                                                                                                                                                                                                                                                                                                                                                                                                                                                                                                                                                                                                                                                                                                                                                                                                                                                                                                                                                                                                                                                                                                                                                                                                                                                                                                                                                                                                                                                                                                                                                                                                                                                                                                                                                                                                                                                                                                                                                                                                                                                                                                                                                                                                                                                                                                                                                                                                                                                                                                                                                                                                                                                                                                                                                                                                                                                                                                                                                                                                                                                                                                                                                                                                                                                                                                                                                                                                                                                                                                                                                                                                                                                                                                                                                                                                                                                                                                                                                                                                                                                                                                                                                                                                                                                                                                                                                                                                                                                                                                                                                                                                                                                                                                                                                                                                                                                                                                                                                                                                                                                                                                                                                                                                                                                                                                                                                                                                                                                                                                                                                                                                                                                                                                                                                                                                                                                                                                                                                                                                                                                                    |                               |
| c87                | Zinc-coordinating       | BetaBetaAlphazinc finger  | 28               | 11                   | 121                 | 0.192                  | 1.673   | 3.596        | Gfi                                                                                                                                                                                                                                                                                                                                                                                                                                                                                                                                                                                                                                                                                                                                                                                                                                                                                                                                                                                                                                                                                                                                                                                                                                                                                                                                                                                                                                                                                                                                                                                                                                                                                                                                                                                                                                                                                                                                                                                                                                                                                                                                                                                                                                                                                                                                                                                                                                                                                                                                                                                                                                                                                                                                                                                                                                                                                                                                                                                                                                                                                                                                                                                                                                                                                                                                                                                                                                                                                                                                                                                                                                                                                                                                                                                                                                                                                                                                                                                                                                                                                                                                                                                                                                                                                                                                                                                                                                                                                                                                                                                                                                                                                                                                                                                                                                                                                                                                                                                                                                                                                                                                                                                                                                                                                                                                                                                                                                                                                                                                                                                                                                                                                                                                                                                                                                                                                                                                                                                                                                                                                                                                                                                                                                                                                                                                                                                                                                                                                                                                                                                                                                                                                                                                                                                                                                                                                                                                                                                                                                                                                                                                                                                                                                                                                                                                                                                                                                                                                                                                                                                                                                                                                                                                                                                                                                                                                                                                                                                                                                                                                                                                                                                                                                                                                                                                                                                                                                                                                                                                                                                                                                                                                                                                                                                                                                                                                                                                                                                                                                                                                                                                                                                                                                            |                               |
| c88                | Zinc-coordinating       | BetaBetaAlphazinc finger  | 17               | 22                   | 33                  | 0.00837                | 7.295   | 3.58         | Gm397_2 Zscan4_2                                                                                                                                                                                                                                                                                                                                                                                                                                                                                                                                                                                                                                                                                                                                                                                                                                                                                                                                                                                                                                                                                                                                                                                                                                                                                                                                                                                                                                                                                                                                                                                                                                                                                                                                                                                                                                                                                                                                                                                                                                                                                                                                                                                                                                                                                                                                                                                                                                                                                                                                                                                                                                                                                                                                                                                                                                                                                                                                                                                                                                                                                                                                                                                                                                                                                                                                                                                                                                                                                                                                                                                                                                                                                                                                                                                                                                                                                                                                                                                                                                                                                                                                                                                                                                                                                                                                                                                                                                                                                                                                                                                                                                                                                                                                                                                                                                                                                                                                                                                                                                                                                                                                                                                                                                                                                                                                                                                                                                                                                                                                                                                                                                                                                                                                                                                                                                                                                                                                                                                                                                                                                                                                                                                                                                                                                                                                                                                                                                                                                                                                                                                                                                                                                                                                                                                                                                                                                                                                                                                                                                                                                                                                                                                                                                                                                                                                                                                                                                                                                                                                                                                                                                                                                                                                                                                                                                                                                                                                                                                                                                                                                                                                                                                                                                                                                                                                                                                                                                                                                                                                                                                                                                                                                                                                                                                                                                                                                                                                                                                                                                                                                                                                                                                                                               |                               |
| c55                | Winged Helix-Turn-Helix | Ets                       | 35               | 4                    | 563                 | 0.0797                 | 0.927   | 3.054        | SPB1 SPB1 FEV E174EF GABPA ELK4 ELK1 ETS1 ELF5                                                                                                                                                                                                                                                                                                                                                                                                                                                                                                                                                                                                                                                                                                                                                                                                                                                                                                                                                                                                                                                                                                                                                                                                                                                                                                                                                                                                                                                                                                                                                                                                                                                                                                                                                                                                                                                                                                                                                                                                                                                                                                                                                                                                                                                                                                                                                                                                                                                                                                                                                                                                                                                                                                                                                                                                                                                                                                                                                                                                                                                                                                                                                                                                                                                                                                                                                                                                                                                                                                                                                                                                                                                                                                                                                                                                                                                                                                                                                                                                                                                                                                                                                                                                                                                                                                                                                                                                                                                                                                                                                                                                                                                                                                                                                                                                                                                                                                                                                                                                                                                                                                                                                                                                                                                                                                                                                                                                                                                                                                                                                                                                                                                                                                                                                                                                                                                                                                                                                                                                                                                                                                                                                                                                                                                                                                                                                                                                                                                                                                                                                                                                                                                                                                                                                                                                                                                                                                                                                                                                                                                                                                                                                                                                                                                                                                                                                                                                                                                                                                                                                                                                                                                                                                                                                                                                                                                                                                                                                                                                                                                                                                                                                                                                                                                                                                                                                                                                                                                                                                                                                                                                                                                                                                                                                                                                                                                                                                                                                                                                                                                                                                                                                                                                 |                               |
| c88                | Zinc-coordinating       | BetaBetaAlphazinc finger  | 21               | 18                   | 66                  | 0.0146                 | 3.813   | 2.92         | Zfx                                                                                                                                                                                                                                                                                                                                                                                                                                                                                                                                                                                                                                                                                                                                                                                                                                                                                                                                                                                                                                                                                                                                                                                                                                                                                                                                                                                                                                                                                                                                                                                                                                                                                                                                                                                                                                                                                                                                                                                                                                                                                                                                                                                                                                                                                                                                                                                                                                                                                                                                                                                                                                                                                                                                                                                                                                                                                                                                                                                                                                                                                                                                                                                                                                                                                                                                                                                                                                                                                                                                                                                                                                                                                                                                                                                                                                                                                                                                                                                                                                                                                                                                                                                                                                                                                                                                                                                                                                                                                                                                                                                                                                                                                                                                                                                                                                                                                                                                                                                                                                                                                                                                                                                                                                                                                                                                                                                                                                                                                                                                                                                                                                                                                                                                                                                                                                                                                                                                                                                                                                                                                                                                                                                                                                                                                                                                                                                                                                                                                                                                                                                                                                                                                                                                                                                                                                                                                                                                                                                                                                                                                                                                                                                                                                                                                                                                                                                                                                                                                                                                                                                                                                                                                                                                                                                                                                                                                                                                                                                                                                                                                                                                                                                                                                                                                                                                                                                                                                                                                                                                                                                                                                                                                                                                                                                                                                                                                                                                                                                                                                                                                                                                                                                                                                            |                               |
| c70                | Zinc-coordinating       | BetaBetaAlphazinc finger  | 32               | 7                    | 319                 | 0.0323                 | 4.892   | 2.825        | Zfp410_1 YY1                                                                                                                                                                                                                                                                                                                                                                                                                                                                                                                                                                                                                                                                                                                                                                                                                                                                                                                                                                                                                                                                                                                                                                                                                                                                                                                                                                                                                                                                                                                                                                                                                                                                                                                                                                                                                                                                                                                                                                                                                                                                                                                                                                                                                                                                                                                                                                                                                                                                                                                                                                                                                                                                                                                                                                                                                                                                                                                                                                                                                                                                                                                                                                                                                                                                                                                                                                                                                                                                                                                                                                                                                                                                                                                                                                                                                                                                                                                                                                                                                                                                                                                                                                                                                                                                                                                                                                                                                                                                                                                                                                                                                                                                                                                                                                                                                                                                                                                                                                                                                                                                                                                                                                                                                                                                                                                                                                                                                                                                                                                                                                                                                                                                                                                                                                                                                                                                                                                                                                                                                                                                                                                                                                                                                                                                                                                                                                                                                                                                                                                                                                                                                                                                                                                                                                                                                                                                                                                                                                                                                                                                                                                                                                                                                                                                                                                                                                                                                                                                                                                                                                                                                                                                                                                                                                                                                                                                                                                                                                                                                                                                                                                                                                                                                                                                                                                                                                                                                                                                                                                                                                                                                                                                                                                                                                                                                                                                                                                                                                                                                                                                                                                                                                                                                                   |                               |
| c95                | Zinc-coordinating       | BetaBetaAlphazinc finger  | 17               | 22                   | 40                  | 0.00761                | 5.598   | 2.811        | INSM1                                                                                                                                                                                                                                                                                                                                                                                                                                                                                                                                                                                                                                                                                                                                                                                                                                                                                                                                                                                                                                                                                                                                                                                                                                                                                                                                                                                                                                                                                                                                                                                                                                                                                                                                                                                                                                                                                                                                                                                                                                                                                                                                                                                                                                                                                                                                                                                                                                                                                                                                                                                                                                                                                                                                                                                                                                                                                                                                                                                                                                                                                                                                                                                                                                                                                                                                                                                                                                                                                                                                                                                                                                                                                                                                                                                                                                                                                                                                                                                                                                                                                                                                                                                                                                                                                                                                                                                                                                                                                                                                                                                                                                                                                                                                                                                                                                                                                                                                                                                                                                                                                                                                                                                                                                                                                                                                                                                                                                                                                                                                                                                                                                                                                                                                                                                                                                                                                                                                                                                                                                                                                                                                                                                                                                                                                                                                                                                                                                                                                                                                                                                                                                                                                                                                                                                                                                                                                                                                                                                                                                                                                                                                                                                                                                                                                                                                                                                                                                                                                                                                                                                                                                                                                                                                                                                                                                                                                                                                                                                                                                                                                                                                                                                                                                                                                                                                                                                                                                                                                                                                                                                                                                                                                                                                                                                                                                                                                                                                                                                                                                                                                                                                                                                                                                          |                               |
| c149               | Zipper-type             | Leucine Zipper            | 10               | 29                   | 11                  | 0.00261                | 0.777   | 2.762        | Matk_2                                                                                                                                                                                                                                                                                                                                                                                                                                                                                                                                                                                                                                                                                                                                                                                                                                                                                                                                                                                                                                                                                                                                                                                                                                                                                                                                                                                                                                                                                                                                                                                                                                                                                                                                                                                                                                                                                                                                                                                                                                                                                                                                                                                                                                                                                                                                                                                                                                                                                                                                                                                                                                                                                                                                                                                                                                                                                                                                                                                                                                                                                                                                                                                                                                                                                                                                                                                                                                                                                                                                                                                                                                                                                                                                                                                                                                                                                                                                                                                                                                                                                                                                                                                                                                                                                                                                                                                                                                                                                                                                                                                                                                                                                                                                                                                                                                                                                                                                                                                                                                                                                                                                                                                                                                                                                                                                                                                                                                                                                                                                                                                                                                                                                                                                                                                                                                                                                                                                                                                                                                                                                                                                                                                                                                                                                                                                                                                                                                                                                                                                                                                                                                                                                                                                                                                                                                                                                                                                                                                                                                                                                                                                                                                                                                                                                                                                                                                                                                                                                                                                                                                                                                                                                                                                                                                                                                                                                                                                                                                                                                                                                                                                                                                                                                                                                                                                                                                                                                                                                                                                                                                                                                                                                                                                                                                                                                                                                                                                                                                                                                                                                                                                                                                                                                         |                               |
| c150               | Zipper-type             | Leucine Zipper            | 5                | 34                   | 5                   | 0.00127                | 5.708   | 2.759        | Jundm2_1 Atf1_1                                                                                                                                                                                                                                                                                                                                                                                                                                                                                                                                                                                                                                                                                                                                                                                                                                                                                                                                                                                                                                                                                                                                                                                                                                                                                                                                                                                                                                                                                                                                                                                                                                                                                                                                                                                                                                                                                                                                                                                                                                                                                                                                                                                                                                                                                                                                                                                                                                                                                                                                                                                                                                                                                                                                                                                                                                                                                                                                                                                                                                                                                                                                                                                                                                                                                                                                                                                                                                                                                                                                                                                                                                                                                                                                                                                                                                                                                                                                                                                                                                                                                                                                                                                                                                                                                                                                                                                                                                                                                                                                                                                                                                                                                                                                                                                                                                                                                                                                                                                                                                                                                                                                                                                                                                                                                                                                                                                                                                                                                                                                                                                                                                                                                                                                                                                                                                                                                                                                                                                                                                                                                                                                                                                                                                                                                                                                                                                                                                                                                                                                                                                                                                                                                                                                                                                                                                                                                                                                                                                                                                                                                                                                                                                                                                                                                                                                                                                                                                                                                                                                                                                                                                                                                                                                                                                                                                                                                                                                                                                                                                                                                                                                                                                                                                                                                                                                                                                                                                                                                                                                                                                                                                                                                                                                                                                                                                                                                                                                                                                                                                                                                                                                                                                                                                |                               |
| c127               | Winged Helix-Turn-Helix | Ets                       | 29               | 10                   | 124                 | 0.0278                 | -5      | 2.744        | ELI3_1 E1M_1 Stp1_1 E1H_2 Gabpa_1 Spdel_1 Spdel_2                                                                                                                                                                                                                                                                                                                                                                                                                                                                                                                                                                                                                                                                                                                                                                                                                                                                                                                                                                                                                                                                                                                                                                                                                                                                                                                                                                                                                                                                                                                                                                                                                                                                                                                                                                                                                                                                                                                                                                                                                                                                                                                                                                                                                                                                                                                                                                                                                                                                                                                                                                                                                                                                                                                                                                                                                                                                                                                                                                                                                                                                                                                                                                                                                                                                                                                                                                                                                                                                                                                                                                                                                                                                                                                                                                                                                                                                                                                                                                                                                                                                                                                                                                                                                                                                                                                                                                                                                                                                                                                                                                                                                                                                                                                                                                                                                                                                                                                                                                                                                                                                                                                                                                                                                                                                                                                                                                                                                                                                                                                                                                                                                                                                                                                                                                                                                                                                                                                                                                                                                                                                                                                                                                                                                                                                                                                                                                                                                                                                                                                                                                                                                                                                                                                                                                                                                                                                                                                                                                                                                                                                                                                                                                                                                                                                                                                                                                                                                                                                                                                                                                                                                                                                                                                                                                                                                                                                                                                                                                                                                                                                                                                                                                                                                                                                                                                                                                                                                                                                                                                                                                                                                                                                                                                                                                                                                                                                                                                                                                                                                                                                                                                                                                                              |                               |
| c167               | Helix-Turn-Helix        | Homo                      | 13               | 26                   | 24                  | 0.00533                | 4.519   | 2.628        | Hoxa3_1                                                                                                                                                                                                                                                                                                                                                                                                                                                                                                                                                                                                                                                                                                                                                                                                                                                                                                                                                                                                                                                                                                                                                                                                                                                                                                                                                                                                                                                                                                                                                                                                                                                                                                                                                                                                                                                                                                                                                                                                                                                                                                                                                                                                                                                                                                                                                                                                                                                                                                                                                                                                                                                                                                                                                                                                                                                                                                                                                                                                                                                                                                                                                                                                                                                                                                                                                                                                                                                                                                                                                                                                                                                                                                                                                                                                                                                                                                                                                                                                                                                                                                                                                                                                                                                                                                                                                                                                                                                                                                                                                                                                                                                                                                                                                                                                                                                                                                                                                                                                                                                                                                                                                                                                                                                                                                                                                                                                                                                                                                                                                                                                                                                                                                                                                                                                                                                                                                                                                                                                                                                                                                                                                                                                                                                                                                                                                                                                                                                                                                                                                                                                                                                                                                                                                                                                                                                                                                                                                                                                                                                                                                                                                                                                                                                                                                                                                                                                                                                                                                                                                                                                                                                                                                                                                                                                                                                                                                                                                                                                                                                                                                                                                                                                                                                                                                                                                                                                                                                                                                                                                                                                                                                                                                                                                                                                                                                                                                                                                                                                                                                                                                                                                                                                                                        |                               |
| c143               | Zipper-type             | Helix-Loop-Helix          | 21               | 18                   | 48                  | 0.00913                | -0.127  | 2.628        | Myf                                                                                                                                                                                                                                                                                                                                                                                                                                                                                                                                                                                                                                                                                                                                                                                                                                                                                                                                                                                                                                                                                                                                                                                                                                                                                                                                                                                                                                                                                                                                                                                                                                                                                                                                                                                                                                                                                                                                                                                                                                                                                                                                                                                                                                                                                                                                                                                                                                                                                                                                                                                                                                                                                                                                                                                                                                                                                                                                                                                                                                                                                                                                                                                                                                                                                                                                                                                                                                                                                                                                                                                                                                                                                                                                                                                                                                                                                                                                                                                                                                                                                                                                                                                                                                                                                                                                                                                                                                                                                                                                                                                                                                                                                                                                                                                                                                                                                                                                                                                                                                                                                                                                                                                                                                                                                                                                                                                                                                                                                                                                                                                                                                                                                                                                                                                                                                                                                                                                                                                                                                                                                                                                                                                                                                                                                                                                                                                                                                                                                                                                                                                                                                                                                                                                                                                                                                                                                                                                                                                                                                                                                                                                                                                                                                                                                                                                                                                                                                                                                                                                                                                                                                                                                                                                                                                                                                                                                                                                                                                                                                                                                                                                                                                                                                                                                                                                                                                                                                                                                                                                                                                                                                                                                                                                                                                                                                                                                                                                                                                                                                                                                                                                                                                                                                            |                               |
| c72                | Zinc-coordinating       | BetaBetaAlphazinc finger  | 32               | 7                    | 349                 | 0.0347                 | 6.104   | 2.53         | ZEB1 Zbb7b_2                                                                                                                                                                                                                                                                                                                                                                                                                                                                                                                                                                                                                                                                                                                                                                                                                                                                                                                                                                                                                                                                                                                                                                                                                                                                                                                                                                                                                                                                                                                                                                                                                                                                                                                                                                                                                                                                                                                                                                                                                                                                                                                                                                                                                                                                                                                                                                                                                                                                                                                                                                                                                                                                                                                                                                                                                                                                                                                                                                                                                                                                                                                                                                                                                                                                                                                                                                                                                                                                                                                                                                                                                                                                                                                                                                                                                                                                                                                                                                                                                                                                                                                                                                                                                                                                                                                                                                                                                                                                                                                                                                                                                                                                                                                                                                                                                                                                                                                                                                                                                                                                                                                                                                                                                                                                                                                                                                                                                                                                                                                                                                                                                                                                                                                                                                                                                                                                                                                                                                                                                                                                                                                                                                                                                                                                                                                                                                                                                                                                                                                                                                                                                                                                                                                                                                                                                                                                                                                                                                                                                                                                                                                                                                                                                                                                                                                                                                                                                                                                                                                                                                                                                                                                                                                                                                                                                                                                                                                                                                                                                                                                                                                                                                                                                                                                                                                                                                                                                                                                                                                                                                                                                                                                                                                                                                                                                                                                                                                                                                                                                                                                                                                                                                                                                                   |                               |
| c46                | Beta-Hairpin-Ribbon     | T                         | 9                | 30                   | 14                  | 0.00301                | 5.959   | 2.52         | Eomes_1 T                                                                                                                                                                                                                                                                                                                                                                                                                                                                                                                                                                                                                                                                                                                                                                                                                                                                                                                                                                                                                                                                                                                                                                                                                                                                                                                                                                                                                                                                                                                                                                                                                                                                                                                                                                                                                                                                                                                                                                                                                                                                                                                                                                                                                                                                                                                                                                                                                                                                                                                                                                                                                                                                                                                                                                                                                                                                                                                                                                                                                                                                                                                                                                                                                                                                                                                                                                                                                                                                                                                                                                                                                                                                                                                                                                                                                                                                                                                                                                                                                                                                                                                                                                                                                                                                                                                                                                                                                                                                                                                                                                                                                                                                                                                                                                                                                                                                                                                                                                                                                                                                                                                                                                                                                                                                                                                                                                                                                                                                                                                                                                                                                                                                                                                                                                                                                                                                                                                                                                                                                                                                                                                                                                                                                                                                                                                                                                                                                                                                                                                                                                                                                                                                                                                                                                                                                                                                                                                                                                                                                                                                                                                                                                                                                                                                                                                                                                                                                                                                                                                                                                                                                                                                                                                                                                                                                                                                                                                                                                                                                                                                                                                                                                                                                                                                                                                                                                                                                                                                                                                                                                                                                                                                                                                                                                                                                                                                                                                                                                                                                                                                                                                                                                                                                                      |                               |
| c60                | Zinc-coordinating       | Glial Cells Missing (GCM) | 10               | 29                   | 13                  | 0.0033                 | 3.967   | 2.517        | Gcm1_1                                                                                                                                                                                                                                                                                                                                                                                                                                                                                                                                                                                                                                                                                                                                                                                                                                                                                                                                                                                                                                                                                                                                                                                                                                                                                                                                                                                                                                                                                                                                                                                                                                                                                                                                                                                                                                                                                                                                                                                                                                                                                                                                                                                                                                                                                                                                                                                                                                                                                                                                                                                                                                                                                                                                                                                                                                                                                                                                                                                                                                                                                                                                                                                                                                                                                                                                                                                                                                                                                                                                                                                                                                                                                                                                                                                                                                                                                                                                                                                                                                                                                                                                                                                                                                                                                                                                                                                                                                                                                                                                                                                                                                                                                                                                                                                                                                                                                                                                                                                                                                                                                                                                                                                                                                                                                                                                                                                                                                                                                                                                                                                                                                                                                                                                                                                                                                                                                                                                                                                                                                                                                                                                                                                                                                                                                                                                                                                                                                                                                                                                                                                                                                                                                                                                                                                                                                                                                                                                                                                                                                                                                                                                                                                                                                                                                                                                                                                                                                                                                                                                                                                                                                                                                                                                                                                                                                                                                                                                                                                                                                                                                                                                                                                                                                                                                                                                                                                                                                                                                                                                                                                                                                                                                                                                                                                                                                                                                                                                                                                                                                                                                                                                                                                                                                         |                               |
| c8                 | Zipper-type             | Leucine Zipper            | 13               | 26                   | 24                  | 0.00456                | 5.776   | 2.513        | Cebpa                                                                                                                                                                                                                                                                                                                                                                                                                                                                                                                                                                                                                                                                                                                                                                                                                                                                                                                                                                                                                                                                                                                                                                                                                                                                                                                                                                                                                                                                                                                                                                                                                                                                                                                                                                                                                                                                                                                                                                                                                                                                                                                                                                                                                                                                                                                                                                                                                                                                                                                                                                                                                                                                                                                                                                                                                                                                                                                                                                                                                                                                                                                                                                                                                                                                                                                                                                                                                                                                                                                                                                                                                                                                                                                                                                                                                                                                                                                                                                                                                                                                                                                                                                                                                                                                                                                                                                                                                                                                                                                                                                                                                                                                                                                                                                                                                                                                                                                                                                                                                                                                                                                                                                                                                                                                                                                                                                                                                                                                                                                                                                                                                                                                                                                                                                                                                                                                                                                                                                                                                                                                                                                                                                                                                                                                                                                                                                                                                                                                                                                                                                                                                                                                                                                                                                                                                                                                                                                                                                                                                                                                                                                                                                                                                                                                                                                                                                                                                                                                                                                                                                                                                                                                                                                                                                                                                                                                                                                                                                                                                                                                                                                                                                                                                                                                                                                                                                                                                                                                                                                                                                                                                                                                                                                                                                                                                                                                                                                                                                                                                                                                                                                                                                                                                                          |                               |
| c34                | Zinc-coordinating       | BetaBetaAlphazinc finger  | 16               | 23                   | 33                  | 0.00837                | 3.826   | 2.467        | Egr1_2                                                                                                                                                                                                                                                                                                                                                                                                                                                                                                                                                                                                                                                                                                                                                                                                                                                                                                                                                                                                                                                                                                                                                                                                                                                                                                                                                                                                                                                                                                                                                                                                                                                                                                                                                                                                                                                                                                                                                                                                                                                                                                                                                                                                                                                                                                                                                                                                                                                                                                                                                                                                                                                                                                                                                                                                                                                                                                                                                                                                                                                                                                                                                                                                                                                                                                                                                                                                                                                                                                                                                                                                                                                                                                                                                                                                                                                                                                                                                                                                                                                                                                                                                                                                                                                                                                                                                                                                                                                                                                                                                                                                                                                                                                                                                                                                                                                                                                                                                                                                                                                                                                                                                                                                                                                                                                                                                                                                                                                                                                                                                                                                                                                                                                                                                                                                                                                                                                                                                                                                                                                                                                                                                                                                                                                                                                                                                                                                                                                                                                                                                                                                                                                                                                                                                                                                                                                                                                                                                                                                                                                                                                                                                                                                                                                                                                                                                                                                                                                                                                                                                                                                                                                                                                                                                                                                                                                                                                                                                                                                                                                                                                                                                                                                                                                                                                                                                                                                                                                                                                                                                                                                                                                                                                                                                                                                                                                                                                                                                                                                                                                                                                                                                                                                                                         |                               |
| c108               | Helix-Turn-Helix        | Myb                       | 26               | 13                   | 113                 | 0.0143                 | 2.892   | 2.446        | Myb                                                                                                                                                                                                                                                                                                                                                                                                                                                                                                                                                                                                                                                                                                                                                                                                                                                                                                                                                                                                                                                                                                                                                                                                                                                                                                                                                                                                                                                                                                                                                                                                                                                                                                                                                                                                                                                                                                                                                                                                                                                                                                                                                                                                                                                                                                                                                                                                                                                                                                                                                                                                                                                                                                                                                                                                                                                                                                                                                                                                                                                                                                                                                                                                                                                                                                                                                                                                                                                                                                                                                                                                                                                                                                                                                                                                                                                                                                                                                                                                                                                                                                                                                                                                                                                                                                                                                                                                                                                                                                                                                                                                                                                                                                                                                                                                                                                                                                                                                                                                                                                                                                                                                                                                                                                                                                                                                                                                                                                                                                                                                                                                                                                                                                                                                                                                                                                                                                                                                                                                                                                                                                                                                                                                                                                                                                                                                                                                                                                                                                                                                                                                                                                                                                                                                                                                                                                                                                                                                                                                                                                                                                                                                                                                                                                                                                                                                                                                                                                                                                                                                                                                                                                                                                                                                                                                                                                                                                                                                                                                                                                                                                                                                                                                                                                                                                                                                                                                                                                                                                                                                                                                                                                                                                                                                                                                                                                                                                                                                                                                                                                                                                                                                                                                                                            |                               |
| c26                | Zinc-coordinating       | MtH1                      | 13               | 26                   | 23                  | 0.0062                 | 6.844   | 2.426        | Smad3_1                                                                                                                                                                                                                                                                                                                                                                                                                                                                                                                                                                                                                                                                                                                                                                                                                                                                                                                                                                                                                                                                                                                                                                                                                                                                                                                                                                                                                                                                                                                                                                                                                                                                                                                                                                                                                                                                                                                                                                                                                                                                                                                                                                                                                                                                                                                                                                                                                                                                                                                                                                                                                                                                                                                                                                                                                                                                                                                                                                                                                                                                                                                                                                                                                                                                                                                                                                                                                                                                                                                                                                                                                                                                                                                                                                                                                                                                                                                                                                                                                                                                                                                                                                                                                                                                                                                                                                                                                                                                                                                                                                                                                                                                                                                                                                                                                                                                                                                                                                                                                                                                                                                                                                                                                                                                                                                                                                                                                                                                                                                                                                                                                                                                                                                                                                                                                                                                                                                                                                                                                                                                                                                                                                                                                                                                                                                                                                                                                                                                                                                                                                                                                                                                                                                                                                                                                                                                                                                                                                                                                                                                                                                                                                                                                                                                                                                                                                                                                                                                                                                                                                                                                                                                                                                                                                                                                                                                                                                                                                                                                                                                                                                                                                                                                                                                                                                                                                                                                                                                                                                                                                                                                                                                                                                                                                                                                                                                                                                                                                                                                                                                                                                                                                                                                                        |                               |
| c27                | Zinc-coordinating       | BetaBetaAlphazinc finger  | 18               | 21                   | 38                  | 0.00964                | 1.994   | 2.372        | Osr1_2 Osr2_2 Osr1_1 Osr2_1                                                                                                                                                                                                                                                                                                                                                                                                                                                                                                                                                                                                                                                                                                                                                                                                                                                                                                                                                                                                                                                                                                                                                                                                                                                                                                                                                                                                                                                                                                                                                                                                                                                                                                                                                                                                                                                                                                                                                                                                                                                                                                                                                                                                                                                                                                                                                                                                                                                                                                                                                                                                                                                                                                                                                                                                                                                                                                                                                                                                                                                                                                                                                                                                                                                                                                                                                                                                                                                                                                                                                                                                                                                                                                                                                                                                                                                                                                                                                                                                                                                                                                                                                                                                                                                                                                                                                                                                                                                                                                                                                                                                                                                                                                                                                                                                                                                                                                                                                                                                                                                                                                                                                                                                                                                                                                                                                                                                                                                                                                                                                                                                                                                                                                                                                                                                                                                                                                                                                                                                                                                                                                                                                                                                                                                                                                                                                                                                                                                                                                                                                                                                                                                                                                                                                                                                                                                                                                                                                                                                                                                                                                                                                                                                                                                                                                                                                                                                                                                                                                                                                                                                                                                                                                                                                                                                                                                                                                                                                                                                                                                                                                                                                                                                                                                                                                                                                                                                                                                                                                                                                                                                                                                                                                                                                                                                                                                                                                                                                                                                                                                                                                                                                                                                                    |                               |
| c58                | Other Alpha-Helix       | MADS                      | 10               | 29                   | 12                  | 0.00266                | 1.039   | 2.353        | Srf_1                                                                                                                                                                                                                                                                                                                                                                                                                                                                                                                                                                                                                                                                                                                                                                                                                                                                                                                                                                                                                                                                                                                                                                                                                                                                                                                                                                                                                                                                                                                                                                                                                                                                                                                                                                                                                                                                                                                                                                                                                                                                                                                                                                                                                                                                                                                                                                                                                                                                                                                                                                                                                                                                                                                                                                                                                                                                                                                                                                                                                                                                                                                                                                                                                                                                                                                                                                                                                                                                                                                                                                                                                                                                                                                                                                                                                                                                                                                                                                                                                                                                                                                                                                                                                                                                                                                                                                                                                                                                                                                                                                                                                                                                                                                                                                                                                                                                                                                                                                                                                                                                                                                                                                                                                                                                                                                                                                                                                                                                                                                                                                                                                                                                                                                                                                                                                                                                                                                                                                                                                                                                                                                                                                                                                                                                                                                                                                                                                                                                                                                                                                                                                                                                                                                                                                                                                                                                                                                                                                                                                                                                                                                                                                                                                                                                                                                                                                                                                                                                                                                                                                                                                                                                                                                                                                                                                                                                                                                                                                                                                                                                                                                                                                                                                                                                                                                                                                                                                                                                                                                                                                                                                                                                                                                                                                                                                                                                                                                                                                                                                                                                                                                                                                                                                                          |                               |
| c9                 | Zipper-type             | Leucine Zipper            | 26               | 13                   | 147                 | 0.0225                 | 5.251   | 2.185        | CEBPA HLF NFIL3                                                                                                                                                                                                                                                                                                                                                                                                                                                                                                                                                                                                                                                                                                                                                                                                                                                                                                                                                                                                                                                                                                                                                                                                                                                                                                                                                                                                                                                                                                                                                                                                                                                                                                                                                                                                                                                                                                                                                                                                                                                                                                                                                                                                                                                                                                                                                                                                                                                                                                                                                                                                                                                                                                                                                                                                                                                                                                                                                                                                                                                                                                                                                                                                                                                                                                                                                                                                                                                                                                                                                                                                                                                                                                                                                                                                                                                                                                                                                                                                                                                                                                                                                                                                                                                                                                                                                                                                                                                                                                                                                                                                                                                                                                                                                                                                                                                                                                                                                                                                                                                                                                                                                                                                                                                                                                                                                                                                                                                                                                                                                                                                                                                                                                                                                                                                                                                                                                                                                                                                                                                                                                                                                                                                                                                                                                                                                                                                                                                                                                                                                                                                                                                                                                                                                                                                                                                                                                                                                                                                                                                                                                                                                                                                                                                                                                                                                                                                                                                                                                                                                                                                                                                                                                                                                                                                                                                                                                                                                                                                                                                                                                                                                                                                                                                                                                                                                                                                                                                                                                                                                                                                                                                                                                                                                                                                                                                                                                                                                                                                                                                                                                                                                                                                                                |                               |
| c50                | Zipper-type             | Helix-Loop-Helix          | 22               | 17                   | 60                  | 0.0158                 | 0.9     | 2.138        | Max_1 Bhlhb2_1 Max_2 Tde2a_1 Ascl2_1 Myf6_1 Tde2a_2 Bhlhb2_2                                                                                                                                                                                                                                                                                                                                                                                                                                                                                                                                                                                                                                                                                                                                                                                                                                                                                                                                                                                                                                                                                                                                                                                                                                                                                                                                                                                                                                                                                                                                                                                                                                                                                                                                                                                                                                                                                                                                                                                                                                                                                                                                                                                                                                                                                                                                                                                                                                                                                                                                                                                                                                                                                                                                                                                                                                                                                                                                                                                                                                                                                                                                                                                                                                                                                                                                                                                                                                                                                                                                                                                                                                                                                                                                                                                                                                                                                                                                                                                                                                                                                                                                                                                                                                                                                                                                                                                                                                                                                                                                                                                                                                                                                                                                                                                                                                                                                                                                                                                                                                                                                                                                                                                                                                                                                                                                                                                                                                                                                                                                                                                                                                                                                                                                                                                                                                                                                                                                                                                                                                                                                                                                                                                                                                                                                                                                                                                                                                                                                                                                                                                                                                                                                                                                                                                                                                                                                                                                                                                                                                                                                                                                                                                                                                                                                                                                                                                                                                                                                                                                                                                                                                                                                                                                                                                                                                                                                                                                                                                                                                                                                                                                                                                                                                                                                                                                                                                                                                                                                                                                                                                                                                                                                                                                                                                                                                                                                                                                                                                                                                                                                                                                                                                   |                               |
| c151               | Zipper-type             | Leucine Zipper            | 10               | 29                   | 14                  | 0.00355                | 3.903   | 2.057        | Jundm2_2                                                                                                                                                                                                                                                                                                                                                                                                                                                                                                                                                                                                                                                                                                                                                                                                                                                                                                                                                                                                                                                                                                                                                                                                                                                                                                                                                                                                                                                                                                                                                                                                                                                                                                                                                                                                                                                                                                                                                                                                                                                                                                                                                                                                                                                                                                                                                                                                                                                                                                                                                                                                                                                                                                                                                                                                                                                                                                                                                                                                                                                                                                                                                                                                                                                                                                                                                                                                                                                                                                                                                                                                                                                                                                                                                                                                                                                                                                                                                                                                                                                                                                                                                                                                                                                                                                                                                                                                                                                                                                                                                                                                                                                                                                                                                                                                                                                                                                                                                                                                                                                                                                                                                                                                                                                                                                                                                                                                                                                                                                                                                                                                                                                                                                                                                                                                                                                                                                                                                                                                                                                                                                                                                                                                                                                                                                                                                                                                                                                                                                                                                                                                                                                                                                                                                                                                                                                                                                                                                                                                                                                                                                                                                                                                                                                                                                                                                                                                                                                                                                                                                                                                                                                                                                                                                                                                                                                                                                                                                                                                                                                                                                                                                                                                                                                                                                                                                                                                                                                                                                                                                                                                                                                                                                                                                                                                                                                                                                                                                                                                                                                                                                                                                                                                                                       |                               |
| c28                | Zinc-coordinating       | BetaBetaAlphazinc finger  | 16               | 23                   | 30                  | 0.00791                | -2.151  | 2.021        | Egr1_1 Sox4_1 Bcl6b_2                                                                                                                                                                                                                                                                                                                                                                                                                                                                                                                                                                                                                                                                                                                                                                                                                                                                                                                                                                                                                                                                                                                                                                                                                                                                                                                                                                                                                                                                                                                                                                                                                                                                                                                                                                                                                                                                                                                                                                                                                                                                                                                                                                                                                                                                                                                                                                                                                                                                                                                                                                                                                                                                                                                                                                                                                                                                                                                                                                                                                                                                                                                                                                                                                                                                                                                                                                                                                                                                                                                                                                                                                                                                                                                                                                                                                                                                                                                                                                                                                                                                                                                                                                                                                                                                                                                                                                                                                                                                                                                                                                                                                                                                                                                                                                                                                                                                                                                                                                                                                                                                                                                                                                                                                                                                                                                                                                                                                                                                                                                                                                                                                                                                                                                                                                                                                                                                                                                                                                                                                                                                                                                                                                                                                                                                                                                                                                                                                                                                                                                                                                                                                                                                                                                                                                                                                                                                                                                                                                                                                                                                                                                                                                                                                                                                                                                                                                                                                                                                                                                                                                                                                                                                                                                                                                                                                                                                                                                                                                                                                                                                                                                                                                                                                                                                                                                                                                                                                                                                                                                                                                                                                                                                                                                                                                                                                                                                                                                                                                                                                                                                                                                                                                                                                          |                               |
| c31                | Zinc-coordinating       | BetaBetaAlphazinc finger  | 3                | 36                   | 4                   | 0.00108                | 8.029   | 2.001        | Plagl1_2                                                                                                                                                                                                                                                                                                                                                                                                                                                                                                                                                                                                                                                                                                                                                                                                                                                                                                                                                                                                                                                                                                                                                                                                                                                                                                                                                                                                                                                                                                                                                                                                                                                                                                                                                                                                                                                                                                                                                                                                                                                                                                                                                                                                                                                                                                                                                                                                                                                                                                                                                                                                                                                                                                                                                                                                                                                                                                                                                                                                                                                                                                                                                                                                                                                                                                                                                                                                                                                                                                                                                                                                                                                                                                                                                                                                                                                                                                                                                                                                                                                                                                                                                                                                                                                                                                                                                                                                                                                                                                                                                                                                                                                                                                                                                                                                                                                                                                                                                                                                                                                                                                                                                                                                                                                                                                                                                                                                                                                                                                                                                                                                                                                                                                                                                                                                                                                                                                                                                                                                                                                                                                                                                                                                                                                                                                                                                                                                                                                                                                                                                                                                                                                                                                                                                                                                                                                                                                                                                                                                                                                                                                                                                                                                                                                                                                                                                                                                                                                                                                                                                                                                                                                                                                                                                                                                                                                                                                                                                                                                                                                                                                                                                                                                                                                                                                                                                                                                                                                                                                                                                                                                                                                                                                                                                                                                                                                                                                                                                                                                                                                                                                                                                                                                                                       |                               |
| c64                | Other                   | Other                     | 14               | 25                   | 28                  | 0.00488                | 4.255   | 1.975        | Spz1                                                                                                                                                                                                                                                                                                                                                                                                                                                                                                                                                                                                                                                                                                                                                                                                                                                                                                                                                                                                                                                                                                                                                                                                                                                                                                                                                                                                                                                                                                                                                                                                                                                                                                                                                                                                                                                                                                                                                                                                                                                                                                                                                                                                                                                                                                                                                                                                                                                                                                                                                                                                                                                                                                                                                                                                                                                                                                                                                                                                                                                                                                                                                                                                                                                                                                                                                                                                                                                                                                                                                                                                                                                                                                                                                                                                                                                                                                                                                                                                                                                                                                                                                                                                                                                                                                                                                                                                                                                                                                                                                                                                                                                                                                                                                                                                                                                                                                                                                                                                                                                                                                                                                                                                                                                                                                                                                                                                                                                                                                                                                                                                                                                                                                                                                                                                                                                                                                                                                                                                                                                                                                                                                                                                                                                                                                                                                                                                                                                                                                                                                                                                                                                                                                                                                                                                                                                                                                                                                                                                                                                                                                                                                                                                                                                                                                                                                                                                                                                                                                                                                                                                                                                                                                                                                                                                                                                                                                                                                                                                                                                                                                                                                                                                                                                                                                                                                                                                                                                                                                                                                                                                                                                                                                                                                                                                                                                                                                                                                                                                                                                                                                                                                                                                                                           |                               |
| c41                | Other Alpha-Helix       | High Mobility Group       | 31               | 8                    | 328                 | 0.0511                 | 1.167   | 1.967        | SOX9 Sox30_1 Sox5 SRY SOX10 SOX2 SOX17                                                                                                                                                                                                                                                                                                                                                                                                                                                                                                                                                                                                                                                                                                                                                                                                                                                                                                                                                                                                                                                                                                                                                                                                                                                                                                                                                                                                                                                                                                                                                                                                                                                                                                                                                                                                                                                                                                                                                                                                                                                                                                                                                                                                                                                                                                                                                                                                                                                                                                                                                                                                                                                                                                                                                                                                                                                                                                                                                                                                                                                                                                                                                                                                                                                                                                                                                                                                                                                                                                                                                                                                                                                                                                                                                                                                                                                                                                                                                                                                                                                                                                                                                                                                                                                                                                                                                                                                                                                                                                                                                                                                                                                                                                                                                                                                                                                                                                                                                                                                                                                                                                                                                                                                                                                                                                                                                                                                                                                                                                                                                                                                                                                                                                                                                                                                                                                                                                                                                                                                                                                                                                                                                                                                                                                                                                                                                                                                                                                                                                                                                                                                                                                                                                                                                                                                                                                                                                                                                                                                                                                                                                                                                                                                                                                                                                                                                                                                                                                                                                                                                                                                                                                                                                                                                                                                                                                                                                                                                                                                                                                                                                                                                                                                                                                                                                                                                                                                                                                                                                                                                                                                                                                                                                                                                                                                                                                                                                                                                                                                                                                                                                                                                                                                         | 1                             |
| c38                | Zinc-coordinating       | BetaBetaAlphazinc finger  | 13               | 26                   | 22                  | 0.00558                | 2.673   | 1.935        | Hic1_2                                                                                                                                                                                                                                                                                                                                                                                                                                                                                                                                                                                                                                                                                                                                                                                                                                                                                                                                                                                                                                                                                                                                                                                                                                                                                                                                                                                                                                                                                                                                                                                                                                                                                                                                                                                                                                                                                                                                                                                                                                                                                                                                                                                                                                                                                                                                                                                                                                                                                                                                                                                                                                                                                                                                                                                                                                                                                                                                                                                                                                                                                                                                                                                                                                                                                                                                                                                                                                                                                                                                                                                                                                                                                                                                                                                                                                                                                                                                                                                                                                                                                                                                                                                                                                                                                                                                                                                                                                                                                                                                                                                                                                                                                                                                                                                                                                                                                                                                                                                                                                                                                                                                                                                                                                                                                                                                                                                                                                                                                                                                                                                                                                                                                                                                                                                                                                                                                                                                                                                                                                                                                                                                                                                                                                                                                                                                                                                                                                                                                                                                                                                                                                                                                                                                                                                                                                                                                                                                                                                                                                                                                                                                                                                                                                                                                                                                                                                                                                                                                                                                                                                                                                                                                                                                                                                                                                                                                                                                                                                                                                                                                                                                                                                                                                                                                                                                                                                                                                                                                                                                                                                                                                                                                                                                                                                                                                                                                                                                                                                                                                                                                                                                                                                                                                         |                               |
| c5                 | Helix-Turn-Helix        | Arid                      | 10               | 29                   | 12                  | 0.00323                | -2.192  | 1.924        | Arid3a_1                                                                                                                                                                                                                                                                                                                                                                                                                                                                                                                                                                                                                                                                                                                                                                                                                                                                                                                                                                                                                                                                                                                                                                                                                                                                                                                                                                                                                                                                                                                                                                                                                                                                                                                                                                                                                                                                                                                                                                                                                                                                                                                                                                                                                                                                                                                                                                                                                                                                                                                                                                                                                                                                                                                                                                                                                                                                                                                                                                                                                                                                                                                                                                                                                                                                                                                                                                                                                                                                                                                                                                                                                                                                                                                                                                                                                                                                                                                                                                                                                                                                                                                                                                                                                                                                                                                                                                                                                                                                                                                                                                                                                                                                                                                                                                                                                                                                                                                                                                                                                                                                                                                                                                                                                                                                                                                                                                                                                                                                                                                                                                                                                                                                                                                                                                                                                                                                                                                                                                                                                                                                                                                                                                                                                                                                                                                                                                                                                                                                                                                                                                                                                                                                                                                                                                                                                                                                                                                                                                                                                                                                                                                                                                                                                                                                                                                                                                                                                                                                                                                                                                                                                                                                                                                                                                                                                                                                                                                                                                                                                                                                                                                                                                                                                                                                                                                                                                                                                                                                                                                                                                                                                                                                                                                                                                                                                                                                                                                                                                                                                                                                                                                                                                                                                                       |                               |
| c59                | Zinc-coordinating       | Glial Cells Missing (GCM) | 6                | 33                   | 8                   | 0.00216                | 4.94    | 1.847        | Gcm1_2                                                                                                                                                                                                                                                                                                                                                                                                                                                                                                                                                                                                                                                                                                                                                                                                                                                                                                                                                                                                                                                                                                                                                                                                                                                                                                                                                                                                                                                                                                                                                                                                                                                                                                                                                                                                                                                                                                                                                                                                                                                                                                                                                                                                                                                                                                                                                                                                                                                                                                                                                                                                                                                                                                                                                                                                                                                                                                                                                                                                                                                                                                                                                                                                                                                                                                                                                                                                                                                                                                                                                                                                                                                                                                                                                                                                                                                                                                                                                                                                                                                                                                                                                                                                                                                                                                                                                                                                                                                                                                                                                                                                                                                                                                                                                                                                                                                                                                                                                                                                                                                                                                                                                                                                                                                                                                                                                                                                                                                                                                                                                                                                                                                                                                                                                                                                                                                                                                                                                                                                                                                                                                                                                                                                                                                                                                                                                                                                                                                                                                                                                                                                                                                                                                                                                                                                                                                                                                                                                                                                                                                                                                                                                                                                                                                                                                                                                                                                                                                                                                                                                                                                                                                                                                                                                                                                                                                                                                                                                                                                                                                                                                                                                                                                                                                                                                                                                                                                                                                                                                                                                                                                                                                                                                                                                                                                                                                                                                                                                                                                                                                                                                                                                                                                                                         |                               |
| c160               | Other Alpha-Helix       | High Mobility Group       | 17               | 22                   | 37                  | 0.00908                | -3.993  | 1.836        | Sox1_1 Sox8_2 Hbp1_1                                                                                                                                                                                                                                                                                                                                                                                                                                                                                                                                                                                                                                                                                                                                                                                                                                                                                                                                                                                                                                                                                                                                                                                                                                                                                                                                                                                                                                                                                                                                                                                                                                                                                                                                                                                                                                                                                                                                                                                                                                                                                                                                                                                                                                                                                                                                                                                                                                                                                                                                                                                                                                                                                                                                                                                                                                                                                                                                                                                                                                                                                                                                                                                                                                                                                                                                                                                                                                                                                                                                                                                                                                                                                                                                                                                                                                                                                                                                                                                                                                                                                                                                                                                                                                                                                                                                                                                                                                                                                                                                                                                                                                                                                                                                                                                                                                                                                                                                                                                                                                                                                                                                                                                                                                                                                                                                                                                                                                                                                                                                                                                                                                                                                                                                                                                                                                                                                                                                                                                                                                                                                                                                                                                                                                                                                                                                                                                                                                                                                                                                                                                                                                                                                                                                                                                                                                                                                                                                                                                                                                                                                                                                                                                                                                                                                                                                                                                                                                                                                                                                                                                                                                                                                                                                                                                                                                                                                                                                                                                                                                                                                                                                                                                                                                                                                                                                                                                                                                                                                                                                                                                                                                                                                                                                                                                                                                                                                                                                                                                                                                                                                                                                                                                                                           | 1                             |
| c10                | Zipper-type             | Leucine Zipper            | 18               | 21                   | 32                  | 0.00406                | -1.247  | 1.835        | CREB1                                                                                                                                                                                                                                                                                                                                                                                                                                                                                                                                                                                                                                                                                                                                                                                                                                                                                                                                                                                                                                                                                                                                                                                                                                                                                                                                                                                                                                                                                                                                                                                                                                                                                                                                                                                                                                                                                                                                                                                                                                                                                                                                                                                                                                                                                                                                                                                                                                                                                                                                                                                                                                                                                                                                                                                                                                                                                                                                                                                                                                                                                                                                                                                                                                                                                                                                                                                                                                                                                                                                                                                                                                                                                                                                                                                                                                                                                                                                                                                                                                                                                                                                                                                                                                                                                                                                                                                                                                                                                                                                                                                                                                                                                                                                                                                                                                                                                                                                                                                                                                                                                                                                                                                                                                                                                                                                                                                                                                                                                                                                                                                                                                                                                                                                                                                                                                                                                                                                                                                                                                                                                                                                                                                                                                                                                                                                                                                                                                                                                                                                                                                                                                                                                                                                                                                                                                                                                                                                                                                                                                                                                                                                                                                                                                                                                                                                                                                                                                                                                                                                                                                                                                                                                                                                                                                                                                                                                                                                                                                                                                                                                                                                                                                                                                                                                                                                                                                                                                                                                                                                                                                                                                                                                                                                                                                                                                                                                                                                                                                                                                                                                                                                                                                                                                          |                               |
| c110               | Helix-Turn-Helix        | Myb                       | 8                | 31                   | 12                  | 0.003                  | 5.425   | 1.805        | Myb_2 Myb1_2                                                                                                                                                                                                                                                                                                                                                                                                                                                                                                                                                                                                                                                                                                                                                                                                                                                                                                                                                                                                                                                                                                                                                                                                                                                                                                                                                                                                                                                                                                                                                                                                                                                                                                                                                                                                                                                                                                                                                                                                                                                                                                                                                                                                                                                                                                                                                                                                                                                                                                                                                                                                                                                                                                                                                                                                                                                                                                                                                                                                                                                                                                                                                                                                                                                                                                                                                                                                                                                                                                                                                                                                                                                                                                                                                                                                                                                                                                                                                                                                                                                                                                                                                                                                                                                                                                                                                                                                                                                                                                                                                                                                                                                                                                                                                                                                                                                                                                                                                                                                                                                                                                                                                                                                                                                                                                                                                                                                                                                                                                                                                                                                                                                                                                                                                                                                                                                                                                                                                                                                                                                                                                                                                                                                                                                                                                                                                                                                                                                                                                                                                                                                                                                                                                                                                                                                                                                                                                                                                                                                                                                                                                                                                                                                                                                                                                                                                                                                                                                                                                                                                                                                                                                                                                                                                                                                                                                                                                                                                                                                                                                                                                                                                                                                                                                                                                                                                                                                                                                                                                                                                                                                                                                                                                                                                                                                                                                                                                                                                                                                                                                                                                                                                                                                                                   |                               |
| c24                | Ig-fold                 | Runt                      | 25               | 14                   | 118                 | 0.0206                 | 5.029   | 1.803        | RUNX1-3                                                                                                                                                                                                                                                                                                                                                                                                                                                                                                                                                                                                                                                                                                                                                                                                                                                                                                                                                                                                                                                                                                                                                                                                                                                                                                                                                                                                                                                                                                                                                                                                                                                                                                                                                                                                                                                                                                                                                                                                                                                                                                                                                                                                                                                                                                                                                                                                                                                                                                                                                                                                                                                                                                                                                                                                                                                                                                                                                                                                                                                                                                                                                                                                                                                                                                                                                                                                                                                                                                                                                                                                                                                                                                                                                                                                                                                                                                                                                                                                                                                                                                                                                                                                                                                                                                                                                                                                                                                                                                                                                                                                                                                                                                                                                                                                                                                                                                                                                                                                                                                                                                                                                                                                                                                                                                                                                                                                                                                                                                                                                                                                                                                                                                                                                                                                                                                                                                                                                                                                                                                                                                                                                                                                                                                                                                                                                                                                                                                                                                                                                                                                                                                                                                                                                                                                                                                                                                                                                                                                                                                                                                                                                                                                                                                                                                                                                                                                                                                                                                                                                                                                                                                                                                                                                                                                                                                                                                                                                                                                                                                                                                                                                                                                                                                                                                                                                                                                                                                                                                                                                                                                                                                                                                                                                                                                                                                                                                                                                                                                                                                                                                                                                                                                                                        | 2                             |
| c104               | Zinc-coordinating       | BetaBetaAlphazinc finger  | 25               | 14                   | 156                 | 0.0249                 | 0.371   | 1.793        | Klf4                                                                                                                                                                                                                                                                                                                                                                                                                                                                                                                                                                                                                                                                                                                                                                                                                                                                                                                                                                                                                                                                                                                                                                                                                                                                                                                                                                                                                                                                                                                                                                                                                                                                                                                                                                                                                                                                                                                                                                                                                                                                                                                                                                                                                                                                                                                                                                                                                                                                                                                                                                                                                                                                                                                                                                                                                                                                                                                                                                                                                                                                                                                                                                                                                                                                                                                                                                                                                                                                                                                                                                                                                                                                                                                                                                                                                                                                                                                                                                                                                                                                                                                                                                                                                                                                                                                                                                                                                                                                                                                                                                                                                                                                                                                                                                                                                                                                                                                                                                                                                                                                                                                                                                                                                                                                                                                                                                                                                                                                                                                                                                                                                                                                                                                                                                                                                                                                                                                                                                                                                                                                                                                                                                                                                                                                                                                                                                                                                                                                                                                                                                                                                                                                                                                                                                                                                                                                                                                                                                                                                                                                                                                                                                                                                                                                                                                                                                                                                                                                                                                                                                                                                                                                                                                                                                                                                                                                                                                                                                                                                                                                                                                                                                                                                                                                                                                                                                                                                                                                                                                                                                                                                                                                                                                                                                                                                                                                                                                                                                                                                                                                                                                                                                                                                                           |                               |
| c102               | Zinc-coordinating       | BetaBetaAlphazinc finger  | 5                | 34                   | 5                   | 0.00119                | 1.634   | 1.772        | Zbb12_2                                                                                                                                                                                                                                                                                                                                                                                                                                                                                                                                                                                                                                                                                                                                                                                                                                                                                                                                                                                                                                                                                                                                                                                                                                                                                                                                                                                                                                                                                                                                                                                                                                                                                                                                                                                                                                                                                                                                                                                                                                                                                                                                                                                                                                                                                                                                                                                                                                                                                                                                                                                                                                                                                                                                                                                                                                                                                                                                                                                                                                                                                                                                                                                                                                                                                                                                                                                                                                                                                                                                                                                                                                                                                                                                                                                                                                                                                                                                                                                                                                                                                                                                                                                                                                                                                                                                                                                                                                                                                                                                                                                                                                                                                                                                                                                                                                                                                                                                                                                                                                                                                                                                                                                                                                                                                                                                                                                                                                                                                                                                                                                                                                                                                                                                                                                                                                                                                                                                                                                                                                                                                                                                                                                                                                                                                                                                                                                                                                                                                                                                                                                                                                                                                                                                                                                                                                                                                                                                                                                                                                                                                                                                                                                                                                                                                                                                                                                                                                                                                                                                                                                                                                                                                                                                                                                                                                                                                                                                                                                                                                                                                                                                                                                                                                                                                                                                                                                                                                                                                                                                                                                                                                                                                                                                                                                                                                                                                                                                                                                                                                                                                                                                                                                                                                        |                               |
| c61                | Winged Helix-Turn-Helix | E2F                       | 16               | 23                   | 40                  | 0.00507                | 4.616   | 1.742        | E2F1                                                                                                                                                                                                                                                                                                                                                                                                                                                                                                                                                                                                                                                                                                                                                                                                                                                                                                                                                                                                                                                                                                                                                                                                                                                                                                                                                                                                                                                                                                                                                                                                                                                                                                                                                                                                                                                                                                                                                                                                                                                                                                                                                                                                                                                                                                                                                                                                                                                                                                                                                                                                                                                                                                                                                                                                                                                                                                                                                                                                                                                                                                                                                                                                                                                                                                                                                                                                                                                                                                                                                                                                                                                                                                                                                                                                                                                                                                                                                                                                                                                                                                                                                                                                                                                                                                                                                                                                                                                                                                                                                                                                                                                                                                                                                                                                                                                                                                                                                                                                                                                                                                                                                                                                                                                                                                                                                                                                                                                                                                                                                                                                                                                                                                                                                                                                                                                                                                                                                                                                                                                                                                                                                                                                                                                                                                                                                                                                                                                                                                                                                                                                                                                                                                                                                                                                                                                                                                                                                                                                                                                                                                                                                                                                                                                                                                                                                                                                                                                                                                                                                                                                                                                                                                                                                                                                                                                                                                                                                                                                                                                                                                                                                                                                                                                                                                                                                                                                                                                                                                                                                                                                                                                                                                                                                                                                                                                                                                                                                                                                                                                                                                                                                                                                                                           |                               |
| c138               | Zipper-type             | Helix-Loop-Helix          | 12               | 27                   | 18                  | 0.00342                | 0.546   | 1.709        | NHLH1                                                                                                                                                                                                                                                                                                                                                                                                                                                                                                                                                                                                                                                                                                                                                                                                                                                                                                                                                                                                                                                                                                                                                                                                                                                                                                                                                                                                                                                                                                                                                                                                                                                                                                                                                                                                                                                                                                                                                                                                                                                                                                                                                                                                                                                                                                                                                                                                                                                                                                                                                                                                                                                                                                                                                                                                                                                                                                                                                                                                                                                                                                                                                                                                                                                                                                                                                                                                                                                                                                                                                                                                                                                                                                                                                                                                                                                                                                                                                                                                                                                                                                                                                                                                                                                                                                                                                                                                                                                                                                                                                                                                                                                                                                                                                                                                                                                                                                                                                                                                                                                                                                                                                                                                                                                                                                                                                                                                                                                                                                                                                                                                                                                                                                                                                                                                                                                                                                                                                                                                                                                                                                                                                                                                                                                                                                                                                                                                                                                                                                                                                                                                                                                                                                                                                                                                                                                                                                                                                                                                                                                                                                                                                                                                                                                                                                                                                                                                                                                                                                                                                                                                                                                                                                                                                                                                                                                                                                                                                                                                                                                                                                                                                                                                                                                                                                                                                                                                                                                                                                                                                                                                                                                                                                                                                                                                                                                                                                                                                                                                                                                                                                                                                                                                                                          |                               |
| c119               | Helix-Turn-Helix        | Homo                      | 9                | 30                   | 16                  | 0.00304                | 4.413   | 1.675        | PBX1                                                                                                                                                                                                                                                                                                                                                                                                                                                                                                                                                                                                                                                                                                                                                                                                                                                                                                                                                                                                                                                                                                                                                                                                                                                                                                                                                                                                                                                                                                                                                                                                                                                                                                                                                                                                                                                                                                                                                                                                                                                                                                                                                                                                                                                                                                                                                                                                                                                                                                                                                                                                                                                                                                                                                                                                                                                                                                                                                                                                                                                                                                                                                                                                                                                                                                                                                                                                                                                                                                                                                                                                                                                                                                                                                                                                                                                                                                                                                                                                                                                                                                                                                                                                                                                                                                                                                                                                                                                                                                                                                                                                                                                                                                                                                                                                                                                                                                                                                                                                                                                                                                                                                                                                                                                                                                                                                                                                                                                                                                                                                                                                                                                                                                                                                                                                                                                                                                                                                                                                                                                                                                                                                                                                                                                                                                                                                                                                                                                                                                                                                                                                                                                                                                                                                                                                                                                                                                                                                                                                                                                                                                                                                                                                                                                                                                                                                                                                                                                                                                                                                                                                                                                                                                                                                                                                                                                                                                                                                                                                                                                                                                                                                                                                                                                                                                                                                                                                                                                                                                                                                                                                                                                                                                                                                                                                                                                                                                                                                                                                                                                                                                                                                                                                                                           |                               |
| c142               | Zipper-type             | Helix-Loop-Helix          | 21               | 18                   | 86                  | 0.0136                 | 6.662   | 1.66         | EBF1                                                                                                                                                                                                                                                                                                                                                                                                                                                                                                                                                                                                                                                                                                                                                                                                                                                                                                                                                                                                                                                                                                                                                                                                                                                                                                                                                                                                                                                                                                                                                                                                                                                                                                                                                                                                                                                                                                                                                                                                                                                                                                                                                                                                                                                                                                                                                                                                                                                                                                                                                                                                                                                                                                                                                                                                                                                                                                                                                                                                                                                                                                                                                                                                                                                                                                                                                                                                                                                                                                                                                                                                                                                                                                                                                                                                                                                                                                                                                                                                                                                                                                                                                                                                                                                                                                                                                                                                                                                                                                                                                                                                                                                                                                                                                                                                                                                                                                                                                                                                                                                                                                                                                                                                                                                                                                                                                                                                                                                                                                                                                                                                                                                                                                                                                                                                                                                                                                                                                                                                                                                                                                                                                                                                                                                                                                                                                                                                                                                                                                                                                                                                                                                                                                                                                                                                                                                                                                                                                                                                                                                                                                                                                                                                                                                                                                                                                                                                                                                                                                                                                                                                                                                                                                                                                                                                                                                                                                                                                                                                                                                                                                                                                                                                                                                                                                                                                                                                                                                                                                                                                                                                                                                                                                                                                                                                                                                                                                                                                                                                                                                                                                                                                                                                                                           |                               |
| c128               | Ig-fold                 | Rel                       | 29               | 10                   | 230                 | 0.0294                 | 0.497   | 1.616        | NFATC2 REL RELA NF-kappaB NFKB1                                                                                                                                                                                                                                                                                                                                                                                                                                                                                                                                                                                                                                                                                                                                                                                                                                                                                                                                                                                                                                                                                                                                                                                                                                                                                                                                                                                                                                                                                                                                                                                                                                                                                                                                                                                                                                                                                                                                                                                                                                                                                                                                                                                                                                                                                                                                                                                                                                                                                                                                                                                                                                                                                                                                                                                                                                                                                                                                                                                                                                                                                                                                                                                                                                                                                                                                                                                                                                                                                                                                                                                                                                                                                                                                                                                                                                                                                                                                                                                                                                                                                                                                                                                                                                                                                                                                                                                                                                                                                                                                                                                                                                                                                                                                                                                                                                                                                                                                                                                                                                                                                                                                                                                                                                                                                                                                                                                                                                                                                                                                                                                                                                                                                                                                                                                                                                                                                                                                                                                                                                                                                                                                                                                                                                                                                                                                                                                                                                                                                                                                                                                                                                                                                                                                                                                                                                                                                                                                                                                                                                                                                                                                                                                                                                                                                                                                                                                                                                                                                                                                                                                                                                                                                                                                                                                                                                                                                                                                                                                                                                                                                                                                                                                                                                                                                                                                                                                                                                                                                                                                                                                                                                                                                                                                                                                                                                                                                                                                                                                                                                                                                                                                                                                                                |                               |
| c11                | Zipper-type             | Leucine Zipper            | 29               | 10                   | 215                 | 0.0253                 | 2.357   | 1.611        | NFE2L1: MafG NFE2L2 AP1 NFE2L2                                                                                                                                                                                                                                                                                                                                                                                                                                                                                                                                                                                                                                                                                                                                                                                                                                                                                                                                                                                                                                                                                                                                                                                                                                                                                                                                                                                                                                                                                                                                                                                                                                                                                                                                                                                                                                                                                                                                                                                                                                                                                                                                                                                                                                                                                                                                                                                                                                                                                                                                                                                                                                                                                                                                                                                                                                                                                                                                                                                                                                                                                                                                                                                                                                                                                                                                                                                                                                                                                                                                                                                                                                                                                                                                                                                                                                                                                                                                                                                                                                                                                                                                                                                                                                                                                                                                                                                                                                                                                                                                                                                                                                                                                                                                                                                                                                                                                                                                                                                                                                                                                                                                                                                                                                                                                                                                                                                                                                                                                                                                                                                                                                                                                                                                                                                                                                                                                                                                                                                                                                                                                                                                                                                                                                                                                                                                                                                                                                                                                                                                                                                                                                                                                                                                                                                                                                                                                                                                                                                                                                                                                                                                                                                                                                                                                                                                                                                                                                                                                                                                                                                                                                                                                                                                                                                                                                                                                                                                                                                                                                                                                                                                                                                                                                                                                                                                                                                                                                                                                                                                                                                                                                                                                                                                                                                                                                                                                                                                                                                                                                                                                                                                                                                                                 |                               |
| c29                | Zinc-coordinating       | BetaBetaAlphazinc finger  | 16               | 23                   | 39                  | 0.00986                | 3.338   | 1.608        | Klf7_1 Sp4_2                                                                                                                                                                                                                                                                                                                                                                                                                                                                                                                                                                                                                                                                                                                                                                                                                                                                                                                                                                                                                                                                                                                                                                                                                                                                                                                                                                                                                                                                                                                                                                                                                                                                                                                                                                                                                                                                                                                                                                                                                                                                                                                                                                                                                                                                                                                                                                                                                                                                                                                                                                                                                                                                                                                                                                                                                                                                                                                                                                                                                                                                                                                                                                                                                                                                                                                                                                                                                                                                                                                                                                                                                                                                                                                                                                                                                                                                                                                                                                                                                                                                                                                                                                                                                                                                                                                                                                                                                                                                                                                                                                                                                                                                                                                                                                                                                                                                                                                                                                                                                                                                                                                                                                                                                                                                                                                                                                                                                                                                                                                                                                                                                                                                                                                                                                                                                                                                                                                                                                                                                                                                                                                                                                                                                                                                                                                                                                                                                                                                                                                                                                                                                                                                                                                                                                                                                                                                                                                                                                                                                                                                                                                                                                                                                                                                                                                                                                                                                                                                                                                                                                                                                                                                                                                                                                                                                                                                                                                                                                                                                                                                                                                                                                                                                                                                                                                                                                                                                                                                                                                                                                                                                                                                                                                                                                                                                                                                                                                                                                                                                                                                                                                                                                                                                                   |                               |
| c86                | Zinc-coordinating       | BetaBetaAlphazinc finger  | 4                | 35                   | 5                   | 0.00111                | 3.716   | 1.608        | Zfp187_1                                                                                                                                                                                                                                                                                                                                                                                                                                                                                                                                                                                                                                                                                                                                                                                                                                                                                                                                                                                                                                                                                                                                                                                                                                                                                                                                                                                                                                                                                                                                                                                                                                                                                                                                                                                                                                                                                                                                                                                                                                                                                                                                                                                                                                                                                                                                                                                                                                                                                                                                                                                                                                                                                                                                                                                                                                                                                                                                                                                                                                                                                                                                                                                                                                                                                                                                                                                                                                                                                                                                                                                                                                                                                                                                                                                                                                                                                                                                                                                                                                                                                                                                                                                                                                                                                                                                                                                                                                                                                                                                                                                                                                                                                                                                                                                                                                                                                                                                                                                                                                                                                                                                                                                                                                                                                                                                                                                                                                                                                                                                                                                                                                                                                                                                                                                                                                                                                                                                                                                                                                                                                                                                                                                                                                                                                                                                                                                                                                                                                                                                                                                                                                                                                                                                                                                                                                                                                                                                                                                                                                                                                                                                                                                                                                                                                                                                                                                                                                                                                                                                                                                                                                                                                                                                                                                                                                                                                                                                                                                                                                                                                                                                                                                                                                                                                                                                                                                                                                                                                                                                                                                                                                                                                                                                                                                                                                                                                                                                                                                                                                                                                                                                                                                                                                       |                               |
| c37                | Zinc-coordinating       | BetaBetaAlphazinc finger  | 7                | 32                   | 13                  | 0.0033                 | 8.309   | 1.522        | Hic1_1                                                                                                                                                                                                                                                                                                                                                                                                                                                                                                                                                                                                                                                                                                                                                                                                                                                                                                                                                                                                                                                                                                                                                                                                                                                                                                                                                                                                                                                                                                                                                                                                                                                                                                                                                                                                                                                                                                                                                                                                                                                                                                                                                                                                                                                                                                                                                                                                                                                                                                                                                                                                                                                                                                                                                                                                                                                                                                                                                                                                                                                                                                                                                                                                                                                                                                                                                                                                                                                                                                                                                                                                                                                                                                                                                                                                                                                                                                                                                                                                                                                                                                                                                                                                                                                                                                                                                                                                                                                                                                                                                                                                                                                                                                                                                                                                                                                                                                                                                                                                                                                                                                                                                                                                                                                                                                                                                                                                                                                                                                                                                                                                                                                                                                                                                                                                                                                                                                                                                                                                                                                                                                                                                                                                                                                                                                                                                                                                                                                                                                                                                                                                                                                                                                                                                                                                                                                                                                                                                                                                                                                                                                                                                                                                                                                                                                                                                                                                                                                                                                                                                                                                                                                                                                                                                                                                                                                                                                                                                                                                                                                                                                                                                                                                                                                                                                                                                                                                                                                                                                                                                                                                                                                                                                                                                                                                                                                                                                                                                                                                                                                                                                                                                                                                                                         |                               |
| c134               | Winged Helix-Turn-Helix | IRF                       | 16               | 23                   | 35                  | 0.00804                | 0.327   | 1.518        | IRF3_1 IRF4_1 IRF5_1 IRF6_1 IRF7_1 IRF8_1 IRF9_1 IRF10_1 IRF11_1 IRF12_1 IRF13_1 IRF14_1 IRF15_1 IRF16_1 IRF17_1 IRF18_1 IRF19_1 IRF20_1 IRF21_1 IRF22_1 IRF23_1 IRF24_1 IRF25_1 IRF26_1 IRF27_1 IRF28_1 IRF29_1 IRF30_1 IRF31_1 IRF32_1 IRF33_1 IRF34_1 IRF35_1 IRF36_1 IRF37_1 IRF38_1 IRF39_1 IRF40_1 IRF41_1 IRF42_1 IRF43_1 IRF44_1 IRF45_1 IRF46_1 IRF47_1 IRF48_1 IRF49_1 IRF50_1 IRF51_1 IRF52_1 IRF53_1 IRF54_1 IRF55_1 IRF56_1 IRF57_1 IRF58_1 IRF59_1 IRF60_1 IRF61_1 IRF62_1 IRF63_1 IRF64_1 IRF65_1 IRF66_1 IRF67_1 IRF68_1 IRF69_1 IRF70_1 IRF71_1 IRF72_1 IRF73_1 IRF74_1 IRF75_1 IRF76_1 IRF77_1 IRF78_1 IRF79_1 IRF80_1 IRF81_1 IRF82_1 IRF83_1 IRF84_1 IRF85_1 IRF86_1 IRF87_1 IRF88_1 IRF89_1 IRF90_1 IRF91_1 IRF92_1 IRF93_1 IRF94_1 IRF95_1 IRF96_1 IRF97_1 IRF98_1 IRF99_1 IRF100_1 IRF101_1 IRF102_1 IRF103_1 IRF104_1 IRF105_1 IRF106_1 IRF107_1 IRF108_1 IRF109_1 IRF110_1 IRF111_1 IRF112_1 IRF113_1 IRF114_1 IRF115_1 IRF116_1 IRF117_1 IRF118_1 IRF119_1 IRF120_1 IRF121_1 IRF122_1 IRF123_1 IRF124_1 IRF125_1 IRF126_1 IRF127_1 IRF128_1 IRF129_1 IRF130_1 IRF131_1 IRF132_1 IRF133_1 IRF134_1 IRF135_1 IRF136_1 IRF137_1 IRF138_1 IRF139_1 IRF140_1 IRF141_1 IRF142_1 IRF143_1 IRF144_1 IRF145_1 IRF146_1 IRF147_1 IRF148_1 IRF149_1 IRF150_1 IRF151_1 IRF152_1 IRF153_1 IRF154_1 IRF155_1 IRF156_1 IRF157_1 IRF158_1 IRF159_1 IRF160_1 IRF161_1 IRF162_1 IRF163_1 IRF164_1 IRF165_1 IRF166_1 IRF167_1 IRF168_1 IRF169_1 IRF170_1 IRF171_1 IRF172_1 IRF173_1 IRF174_1 IRF175_1 IRF176_1 IRF177_1 IRF178_1 IRF179_1 IRF180_1 IRF181_1 IRF182_1 IRF183_1 IRF184_1 IRF185_1 IRF186_1 IRF187_1 IRF188_1 IRF189_1 IRF190_1 IRF191_1 IRF192_1 IRF193_1 IRF194_1 IRF195_1 IRF196_1 IRF197_1 IRF198_1 IRF199_1 IRF200_1 IRF201_1 IRF202_1 IRF203_1 IRF204_1 IRF205_1 IRF206_1 IRF207_1 IRF208_1 IRF209_1 IRF210_1 IRF211_1 IRF212_1 IRF213_1 IRF214_1 IRF215_1 IRF216_1 IRF217_1 IRF218_1 IRF219_1 IRF220_1 IRF221_1 IRF222_1 IRF223_1 IRF224_1 IRF225_1 IRF226_1 IRF227_1 IRF228_1 IRF229_1 IRF230_1 IRF231_1 IRF232_1 IRF233_1 IRF234_1 IRF235_1 IRF236_1 IRF237_1 IRF238_1 IRF239_1 IRF240_1 IRF241_1 IRF242_1 IRF243_1 IRF244_1 IRF245_1 IRF246_1 IRF247_1 IRF248_1 IRF249_1 IRF250_1 IRF251_1 IRF252_1 IRF253_1 IRF254_1 IRF255_1 IRF256_1 IRF257_1 IRF258_1 IRF259_1 IRF260_1 IRF261_1 IRF262_1 IRF263_1 IRF264_1 IRF265_1 IRF266_1 IRF267_1 IRF268_1 IRF269_1 IRF270_1 IRF271_1 IRF272_1 IRF273_1 IRF274_1 IRF275_1 IRF276_1 IRF277_1 IRF278_1 IRF279_1 IRF280_1 IRF281_1 IRF282_1 IRF283_1 IRF284_1 IRF285_1 IRF286_1 IRF287_1 IRF288_1 IRF289_1 IRF290_1 IRF291_1 IRF292_1 IRF293_1 IRF294_1 IRF295_1 IRF296_1 IRF297_1 IRF298_1 IRF299_1 IRF300_1 IRF301_1 IRF302_1 IRF303_1 IRF304_1 IRF305_1 IRF306_1 IRF307_1 IRF308_1 IRF309_1 IRF310_1 IRF311_1 IRF312_1 IRF313_1 IRF314_1 IRF315_1 IRF316_1 IRF317_1 IRF318_1 IRF319_1 IRF320_1 IRF321_1 IRF322_1 IRF323_1 IRF324_1 IRF325_1 IRF326_1 IRF327_1 IRF328_1 IRF329_1 IRF330_1 IRF331_1 IRF332_1 IRF333_1 IRF334_1 IRF335_1 IRF336_1 IRF337_1 IRF338_1 IRF339_1 IRF340_1 IRF341_1 IRF342_1 IRF343_1 IRF344_1 IRF345_1 IRF346_1 IRF347_1 IRF348_1 IRF349_1 IRF350_1 IRF351_1 IRF352_1 IRF353_1 IRF354_1 IRF355_1 IRF356_1 IRF357_1 IRF358_1 IRF359_1 IRF360_1 IRF361_1 IRF362_1 IRF363_1 IRF364_1 IRF365_1 IRF366_1 IRF367_1 IRF368_1 IRF369_1 IRF370_1 IRF371_1 IRF372_1 IRF373_1 IRF374_1 IRF375_1 IRF376_1 IRF377_1 IRF378_1 IRF379_1 IRF380_1 IRF381_1 IRF382_1 IRF383_1 IRF384_1 IRF385_1 IRF386_1 IRF387_1 IRF388_1 IRF389_1 IRF390_1 IRF391_1 IRF392_1 IRF393_1 IRF394_1 IRF395_1 IRF396_1 IRF397_1 IRF398_1 IRF399_1 IRF400_1 IRF401_1 IRF402_1 IRF403_1 IRF404_1 IRF405_1 IRF406_1 IRF407_1 IRF408_1 IRF409_1 IRF410_1 IRF411_1 IRF412_1 IRF413_1 IRF414_1 IRF415_1 IRF416_1 IRF417_1 IRF418_1 IRF419_1 IRF420_1 IRF421_1 IRF422_1 IRF423_1 IRF424_1 IRF425_1 IRF426_1 IRF427_1 IRF428_1 IRF429_1 IRF430_1 IRF431_1 IRF432_1 IRF433_1 IRF434_1 IRF435_1 IRF436_1 IRF437_1 IRF438_1 IRF439_1 IRF440_1 IRF441_1 IRF442_1 IRF443_1 IRF444_1 IRF445_1 IRF446_1 IRF447_1 IRF448_1 IRF449_1 IRF450_1 IRF451_1 IRF452_1 IRF453_1 IRF454_1 IRF455_1 IRF456_1 IRF457_1 IRF458_1 IRF459_1 IRF460_1 IRF461_1 IRF462_1 IRF463_1 IRF464_1 IRF465_1 IRF466_1 IRF467_1 IRF468_1 IRF469_1 IRF470_1 IRF471_1 IRF472_1 IRF473_1 IRF474_1 IRF475_1 IRF476_1 IRF477_1 IRF478_1 IRF479_1 IRF480_1 IRF481_1 IRF482_1 IRF483_1 IRF484_1 IRF485_1 IRF486_1 IRF487_1 IRF488_1 IRF489_1 IRF490_1 IRF491_1 IRF492_1 IRF493_1 IRF494_1 IRF495_1 IRF496_1 IRF497_1 IRF498_1 IRF499_1 IRF500_1 IRF501_1 IRF502_1 IRF503_1 IRF504_1 IRF505_1 IRF506_1 IRF507_1 IRF508_1 IRF509_1 IRF510_1 IRF511_1 IRF512_1 IRF513_1 IRF514_1 IRF515_1 IRF516_1 IRF517_1 IRF518_1 IRF519_1 IRF520_1 IRF521_1 IRF522_1 IRF523_1 IRF524_1 IRF525_1 IRF526_1 IRF527_1 IRF528_1 IRF529_1 IRF530_1 IRF531_1 IRF532_1 IRF533_1 IRF534_1 IRF535_1 IRF536_1 IRF537_1 IRF538_1 IRF539_1 IRF540_1 IRF541_1 IRF542_1 IRF543_1 IRF544_1 IRF545_1 IRF546_1 IRF547_1 IRF548_1 IRF549_1 IRF550_1 IRF551_1 IRF552_1 IRF553_1 IRF554_1 IRF555_1 IRF556_1 IRF557_1 IRF558_1 IRF559_1 IRF560_1 IRF561_1 IRF562_1 IRF563_1 IRF564_1 IRF565_1 IRF566_1 IRF567_1 IRF568_1 IRF569_1 IRF570_1 IRF571_1 IRF572_1 IRF573_1 IRF574_1 IRF575_1 IRF576_1 IRF577_1 IRF578_1 IRF579_1 IRF580_1 IRF581_1 IRF582_1 IRF583_1 IRF584_1 IRF585_1 IRF586_1 IRF587_1 IRF588_1 IRF589_1 IRF590_1 IRF591_1 IRF592_1 IRF593_1 IRF594_1 IRF595_1 IRF596_1 IRF597_1 IRF598_1 IRF599_1 IRF600_1 IRF601_1 IRF602_1 IRF603_1 IRF604_1 IRF605_1 IRF606_1 IRF607_1 IRF608_1 IRF609_1 IRF610_1 IRF611_1 IRF612_1 IRF613_1 IRF614_1 IRF615_1 IRF616_1 IRF617_1 IRF618_1 IRF619_1 IRF620_1 IRF621_1 IRF622_1 IRF623_1 IRF624_1 IRF625_1 IRF626_1 IRF627_1 IRF628_1 IRF629_1 IRF630_1 IRF631_1 IRF632_1 IRF633_1 IRF634_1 IRF635_1 IRF636_1 IRF637_1 IRF638_1 IRF639_1 IRF640_1 IRF641_1 IRF642_1 IRF643_1 IRF644_1 IRF645_1 IRF646_1 IRF647_1 IRF648_1 IRF649_1 IRF650_1 IRF651_1 IRF652_1 IRF653_1 IRF654_1 IRF655_1 IRF656_1 IRF657_1 IRF658_1 IRF659_1 IRF660_1 IRF661_1 IRF662_1 IRF663_1 IRF664_1 IRF665_1 IRF666_1 IRF667_1 IRF668_1 IRF669_1 IRF670_1 IRF671_1 IRF672_1 IRF673_1 IRF674_1 IRF675_1 IRF676_1 IRF677_1 IRF678_1 IRF679_1 IRF680_1 IRF681_1 IRF682_1 IRF683_1 IRF684_1 IRF685_1 IRF686_1 IRF687_1 IRF688_1 IRF689_1 IRF690_1 IRF691_1 IRF692_1 IRF693_1 IRF694_1 IRF695_1 IRF696_1 IRF697_1 IRF698_1 IRF699_1 IRF700_1 IRF701_1 IRF702_1 IRF703_1 IRF704_1 IRF705_1 IRF706_1 IRF707_1 IRF708_1 IRF709_1 IRF710_1 IRF711_1 IRF712_1 IRF713_1 IRF714_1 IRF715_1 IRF716_1 IRF717_1 IRF718_1 IRF719_1 IRF720_1 IRF721_1 IRF722_1 IRF723_1 IRF724_1 IRF725_1 IRF726_1 IRF727_1 IRF728_1 IRF729_1 IRF730_1 IRF731_1 IRF732_1 IRF733_1 IRF734_1 IRF735_1 IRF736_1 IRF737_1 IRF738_1 IRF739_1 IRF740_1 IRF741_1 IRF742_1 IRF743_1 IRF744_1 IRF745_1 IRF746_1 IRF747_1 IRF748_1 IRF749_1 IRF750_1 IRF751_1 IRF752_1 IRF753_1 IRF754_1 IRF755_1 IRF756_1 IRF757_1 IRF758_1 IRF759_1 IRF760_1 IRF761_1 IRF762_1 IRF763_1 IRF764_1 IRF765_1 IRF766_1 IRF767_1 IRF768_1 IRF769_1 IRF770_1 IRF771_1 IRF772_1 IRF773_1 IRF774_1 IRF775_1 IRF776_1 IRF777_1 IRF778_1 IRF779_1 IRF780_1 IRF781_1 IRF782_1 IRF783_1 IRF784_1 IRF785_1 IRF786_1 IRF787_1 IRF788_1 IRF789_1 IRF790_1 IRF791_1 IRF792_1 IRF793_1 IRF794_1 IRF795_1 IRF796_1 IRF797_1 IRF798_1 IRF799_1 IRF800_1 IRF801_1 IRF802_1 IRF803_1 IRF804_1 IRF805_1 IRF806_1 IRF807_1 IRF808_1 IRF809_1 IRF810_1 IRF811_1 IRF812_1 IRF813_1 IRF814_1 IRF815_1 IRF816_1 IRF817_1 IRF818_1 IRF819_1 IRF820_1 IRF821_1 IRF822_1 IRF823_1 IRF824_1 IRF825_1 IRF826_1 IRF827_1 IRF828_1 IRF829_1 IRF830_1 IRF831_1 IRF832_1 IRF833_1 IRF834_1 IRF835_1 IRF836_1 IRF837_1 IRF838_1 IRF839_1 IRF840_1 IRF841_1 IRF842_1 IRF843_1 IRF844_1 IRF845_1 IRF846_1 IRF847_1 IRF848_1 IRF849_1 IRF850_1 IRF851_1 IRF852_1 IRF853_1 IRF854_1 IRF855_1 IRF856_1 IRF857_1 IRF858_1 IRF859_1 IRF860_1 IRF861_1 IRF862_1 IRF863_1 IRF864_1 IRF865_1 IRF866_1 IRF867_1 IRF868_1 IRF869_1 IRF870_1 IRF871_1 IRF872_1 IRF873_1 IRF874_1 IRF875_1 IRF876_1 IRF877_1 IRF878_1 IRF879_1 IRF880_1 IRF881_1 IRF882_1 IRF883_1 IRF884_1 IRF885_1 IRF886_1 IRF887_1 IRF888_1 IRF889_1 IRF890_1 IRF891_1 IRF892_1 IRF893_1 IRF894_1 IRF895_1 IRF896_1 IRF897_1 IRF898_1 IRF899_1 IRF900_1 IRF901_1 IRF902_1 IRF903_1 IRF904_1 IRF905_1 IRF906_1 IRF907_1 IRF908_1 IRF909_1 IRF910_1 IRF911_1 IRF912_1 IRF913_1 IRF914_1 IRF915_1 IRF916_1 IRF917_1 IRF918_1 IRF919_1 IRF920_1 IRF921_1 IRF922_1 IRF923_1 IRF924_1 IRF925_1 IRF926_1 IRF927_1 IRF928_1 IRF929_1 IRF930_1 IRF931_1 IRF932_1 IRF933_1 IRF934_1 IRF935_1 IRF936_1 IRF937_1 IRF938_1 IRF939_1 IRF940_1 IRF941_1 IRF942_1 IRF943_1 IRF944_1 IRF945_1 IRF946_1 IRF947_1 IRF948_1 IRF949_1 IRF950_1 IRF951_1 IRF952_1 IRF953_1 IRF954_1 IRF955_1 IRF956_1 IRF957_1 IRF958_1 IRF959_1 IRF960_1 IRF961_1 IRF962_1 IRF963_1 IRF964_1 IRF965_1 IRF966_1 IRF967_1 IRF968_1 IRF969_1 IRF970_1 IRF971_1 IRF972_1 IRF973_1 IRF974_1 IRF975_1 IRF976_1 IRF977_1 IRF978_1 IRF979_1 IRF980_1 IRF981_1 IRF982_1 IRF983_1 IRF984_1 IRF985_1 IRF986_1 IRF987_1 IRF988_1 IRF989_1 IRF990_1 IRF991_1 IRF992_1 IRF993_1 IRF994_1 IRF995_1 IRF996_1 IRF997_1 IRF998_1 IRF999_1 IRF1000_1 |                               |

\* p38-regulated highlighted

References:

1. Tchénio T, et al., Nucleic Acids Res. 2000 Jan 15;28(2):411-5. doi: 10.1093/nar/28.2.411.

2. Yang N, et al., Nucleic Acids Res. 2003 Aug 15;31(16):4929-40. doi: 10.1093/nar/gkg663.

3. Penzkofer T, et al., Nucleic Acids Res. 2017 Jan 4;45(D1):D68-D73. doi: 10.1093/nar/gkw925. Epub 2016 Oct 18.

**Table S5.** Antibodies used in this study.

**Table S5. Antibodies used in this study**

|                                        | Supplier          | Cat #      | Fold dilution |
|----------------------------------------|-------------------|------------|---------------|
| <b>Primary antibodies:</b>             |                   |            |               |
| Acetyl-lysine                          | Cell Signaling    | 9441       | 1000          |
| ALDH1A3                                | Abcam             | ab129815   | 1000          |
| CD44                                   | Cell Signaling    | 3570       | 1000          |
| DNMT1                                  | Cell Signaling    | 5032       | 1000          |
| ERK1/2                                 | Cell Signaling    | 4695       | 1000          |
| FLAG                                   | Sigma             | F1804      | 5000          |
| GAPDH                                  | Cell Signaling    | 2118       | 3000          |
| GFP                                    | Cell Signaling    | 2955       | 1000          |
| HA-tag                                 | Thermo Scientific | 26183      | 2000          |
| histone H2A.X (phospho S139)           | Cell Signaling    | 9718       | 2000          |
| KAT5                                   | Novus             | NBP2-20647 | 1000          |
| LINE-1 Orf2p                           | Abcam             | ab106004   | 500           |
| Myc-tag                                | Cell Signaling    | 2276       | 2000          |
| NOS2                                   | Cell Signaling    | 13120      | 1000          |
| Notch1                                 | Cell Signaling    | 4380       | 1000          |
| p38-MAPK (phospho T180/Y182)           | Cell Signaling    | 9215       | 1000          |
| TET2                                   | Cell Signaling    | 45010      | 1000          |
| total p38                              | Cell Signaling    | 8690       | 1000          |
| $\alpha/\beta$ -tubulin                | Cell Signaling    | 2148       | 3000          |
| $\beta$ -actin                         | Sigma             | A5316      | 10000         |
| <b>Secondary antibodies:</b>           |                   |            |               |
| anti-chicken                           | InVitrogen        | A16054     | 2000          |
| anti-mouse IgG (H+L) Alexa Fluor 488   | InVitrogen        | A11008     | 10000         |
| anti-mouse IgG-HRP                     | Cell Signaling    | 7076       | 5000          |
| anti-rabbit IgG-HRP                    | Cell Signaling    | 7074       | 5000          |
| streptavidin-HRP                       | Cell Signaling    | 3999       | 10000         |
| <b>FACS antibodies:</b>                |                   |            |               |
| DNMT1-PE                               | Cell Signaling    | 64503      | 500           |
| Rabbit IgG-PE                          | Cell Signaling    | 5742       | 3000          |
| <b>Immunofluorescence antibodies:</b>  |                   |            |               |
| histone H2A.X (phospho S139)           | Cell Signaling    | 9718       | 500           |
| anti-rabbit IgG (H+L) Alexa Fluor 594  | InVitrogen        | A11021     | 5000          |
| <b>Immunoprecipitation antibodies:</b> |                   |            |               |
| anti-HA-tag conjugated magnetic beads  | Cell Signaling    | 11846      | n/a           |
| anti-Myc-tag conjugated magnetic beads | Cell Signaling    | 5698       | n/a           |

**Table S6.** qPCR primers.

**Table S6. qPCR primers**

| <b>Gene</b> | <b>UPL probe</b> | <b>Right/Forward Primer</b>            | <b>Left/Reverse Primer</b> |
|-------------|------------------|----------------------------------------|----------------------------|
| DNMT1       | 9                | ACG GGA CTG GAC AGC TTG                | ACC AAG AAC GGC ATC CTG TA |
| HPRT        | 22               | GTG TCA ATT ATA TCT TCC ACA ATC<br>AAG | GAC CAG TCA ACA GGG GAC AT |
| hL1-ORF2    | -                | GAG AGG ATG CGG AGA AAT AGG A          | GGA TGG CTG GGT CAA ATG GT |

**Dataset S1 (separate file).** Differentially methylated loci ( $\beta \geq 0.2$ ) MDA-MB-231 control 5AZA DETANO

## SI References

1. Terunuma A, Putluri N, Mishra P, Mathé EA, Dorsey TH, Yi M, Wallace TA, Issaq HJ, Zhou M, Killian JK, Stevenson HS, Karoly ED, Chan K, Samanta S, Prieto D, Hsu TY, Kurley SJ, Putluri V, Sonavane R, Edelman DC, Wulff J, Starks AM, Yang Y, Kittles RA, Yfantis HG, Lee DH, Ioffe OB, Schiff R, Stephens RM, Meltzer PS, Veenstra TD, Westbrook TF, Sreekumar A, Ambros S. MYC-driven accumulation of 2-hydroxyglutarate is associated with breast cancer prognosis. *J Clin Invest.* 2014 Jan;124(1):398-412. doi: 10.1172/JCI71180. Epub 2013 Dec 9. PMID: 24316975; PMCID: PMC3871244.
2. Tchénio T, Casella JF, Heidmann T. Members of the SRY family regulate the human LINE retrotransposons. *Nucleic Acids Res.* 2000 Jan 15;28(2):411-5. doi: 10.1093/nar/28.2.411. PMID: 10606637; PMCID: PMC102531.
3. Yang N, Zhang L, Zhang Y, Kazazian HH Jr. An important role for RUNX3 in human L1 transcription and retrotransposition. *Nucleic Acids Res.* 2003 Aug 15;31(16):4929-40. doi: 10.1093/nar/gkg663. PMID: 12907736; PMCID: PMC169909.
4. Penzkofer T, Jäger M, Figlerowicz M, Badge R, Mundlos S, Robinson PN, Zemojtel T. L1Base 2: more retrotransposition-active LINE-1s, more mammalian genomes. *Nucleic Acids Res.* 2017 Jan 4;45(D1):D68-D73. doi: 10.1093/nar/gkw925. Epub 2016 Oct 18. PMID: 27924012; PMCID: PMC5210629.
